# Supplementary material
Source: PubMed Central journal article supplement (PMC6083785)
Supplement: MD-009-C7MD00578D-s001.pdf [file MD-009-C7MD00578D-s001.pdf]

## **Design, synthesis and biological evaluation of 3',4',5'-trimethoxy flavonoid benzimidazole derivatives as potential anti-tumor agents**

Zhe Wang<sup>a,1</sup>, Xiangping Deng<sup>a,1</sup>, Runde Xiong<sup>a</sup>, Shujuan Xiong<sup>a</sup>, Juan Liu<sup>a</sup>, Xuan Cao<sup>a</sup>,  
Xiaoyong Lei<sup>a</sup>, Yanming Chen<sup>b</sup>, Xing Zheng<sup>a,\*</sup>, Guotao Tang<sup>a,\*</sup>

<sup>a</sup>Institute of Pharmacy and Pharmacology, Hunan Province Cooperative Innovation  
Center for Molecular Target New Drug Study, University of South China, Hengyang, C  
hina,

<sup>b</sup>Mu Dan Jiang You Bo Pharmacertical Co.Ltd, Mudanjiang, China

\*Corresponding Author: Dr. Guotao Tang, Ph.D. Dr .Xing Zheng, Ph.D

Corresponding author at:

Guotao Tang, Xing Zheng, Institute of Pharmacy and Pharmacology, University of  
South China, Hengyang, Hunan, 421001, People's Republic of China.

E-mail adress: [tgtzq@163.com](mailto:tgtzq@163.com) (Guotao Tang), [2393628359@qq.com](mailto:2393628359@qq.com) (Xing Zheng)

<sup>1</sup> These authors contributed equally to this work.

## Table of contents

|                                                                                |    |
|--------------------------------------------------------------------------------|----|
| <sup>1</sup> H NMR and <sup>13</sup> C NMR spectra of compound <b>4a</b> ..... | 2  |
| <sup>1</sup> H NMR and <sup>13</sup> C NMR spectra of compound <b>4b</b> ..... | 3  |
| <sup>1</sup> H NMR and <sup>13</sup> C NMR spectra of compound <b>4c</b> ..... | 4  |
| <sup>1</sup> H NMR and <sup>13</sup> C NMR spectra of compound <b>5</b> .....  | 5  |
| <sup>1</sup> H NMR and <sup>13</sup> C NMR spectra of compound <b>6</b> .....  | 6  |
| <sup>1</sup> H NMR and <sup>13</sup> C NMR spectra of compound <b>7</b> .....  | 7  |
| <sup>1</sup> H NMR and <sup>13</sup> C NMR spectra of compound <b>8</b> .....  | 8  |
| <sup>1</sup> H NMR and <sup>13</sup> C NMR spectra of compound <b>9</b> .....  | 9  |
| <sup>1</sup> H NMR and <sup>13</sup> C NMR spectra of compound <b>10</b> ..... | 10 |
| <sup>1</sup> H NMR and <sup>13</sup> C NMR spectra of compound <b>11</b> ..... | 11 |
| <sup>1</sup> H NMR and <sup>13</sup> C NMR spectra of compound <b>12</b> ..... | 12 |
| <sup>1</sup> H NMR and <sup>13</sup> C NMR spectra of compound <b>13</b> ..... | 13 |
| <sup>1</sup> H NMR and <sup>13</sup> C NMR spectra of compound <b>14</b> ..... | 14 |
| <sup>1</sup> H NMR and <sup>13</sup> C NMR spectra of compound <b>15</b> ..... | 15 |
| <sup>1</sup> H NMR and <sup>13</sup> C NMR spectra of compound <b>16</b> ..... | 16 |
| <sup>1</sup> H NMR and <sup>13</sup> C NMR spectra of compound <b>17</b> ..... | 17 |
| <sup>1</sup> H NMR and <sup>13</sup> C NMR spectra of compound <b>18</b> ..... | 18 |
| <sup>1</sup> H NMR and <sup>13</sup> C NMR spectra of compound <b>19</b> ..... | 19 |
| <sup>1</sup> H NMR and <sup>13</sup> C NMR spectra of compound <b>20</b> ..... | 20 |
| <sup>1</sup> H NMR and <sup>13</sup> C NMR spectra of compound <b>21</b> ..... | 21 |
| <sup>1</sup> H NMR and <sup>13</sup> C NMR spectra of compound <b>22</b> ..... | 22 |
| <sup>1</sup> H NMR and <sup>13</sup> C NMR spectra of compound <b>23</b> ..... | 23 |
| <sup>1</sup> H NMR and <sup>13</sup> C NMR spectra of compound <b>24</b> ..... | 24 |
| <sup>1</sup> H NMR and <sup>13</sup> C NMR spectra of compound <b>25</b> ..... | 25 |
| <sup>1</sup> H NMR and <sup>13</sup> C NMR spectra of compound <b>26</b> ..... | 26 |
| <sup>1</sup> H NMR and <sup>13</sup> C NMR spectra of compound <b>27</b> ..... | 27 |
| <sup>1</sup> H NMR and <sup>13</sup> C NMR spectra of compound <b>28</b> ..... | 28 |

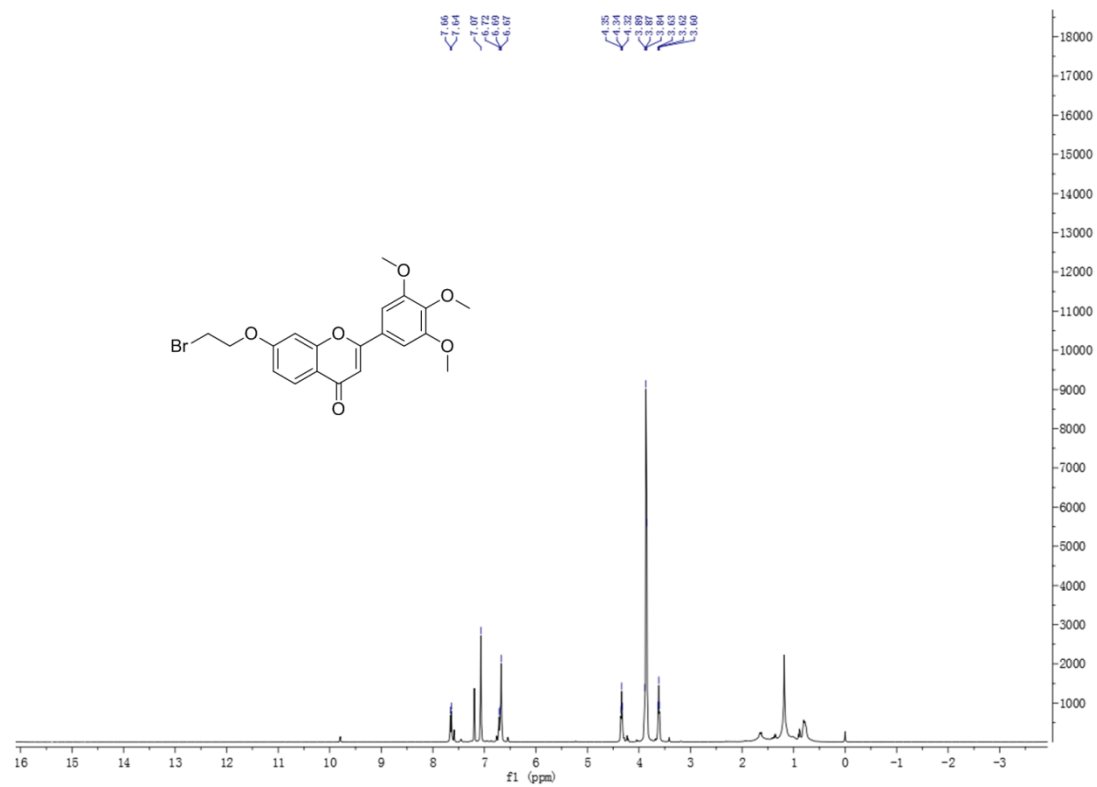

<sup>1</sup>H NMR of compound 4a

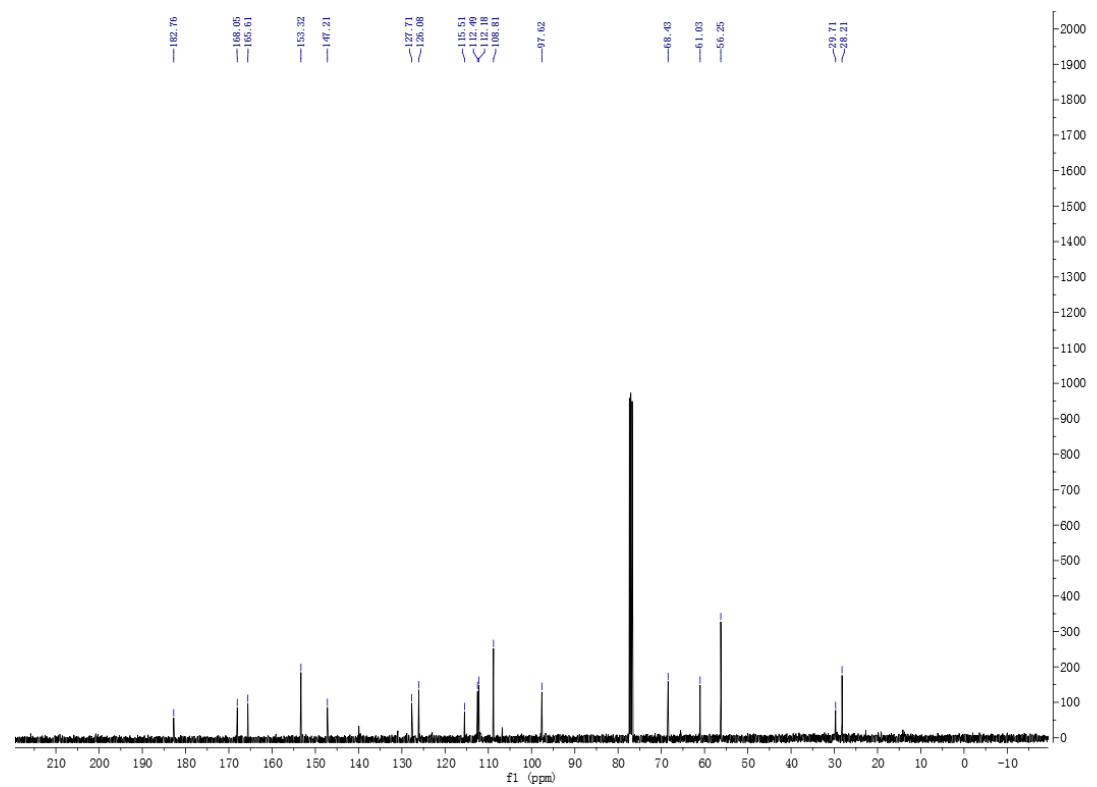

<sup>13</sup>C NMR of compound 4a

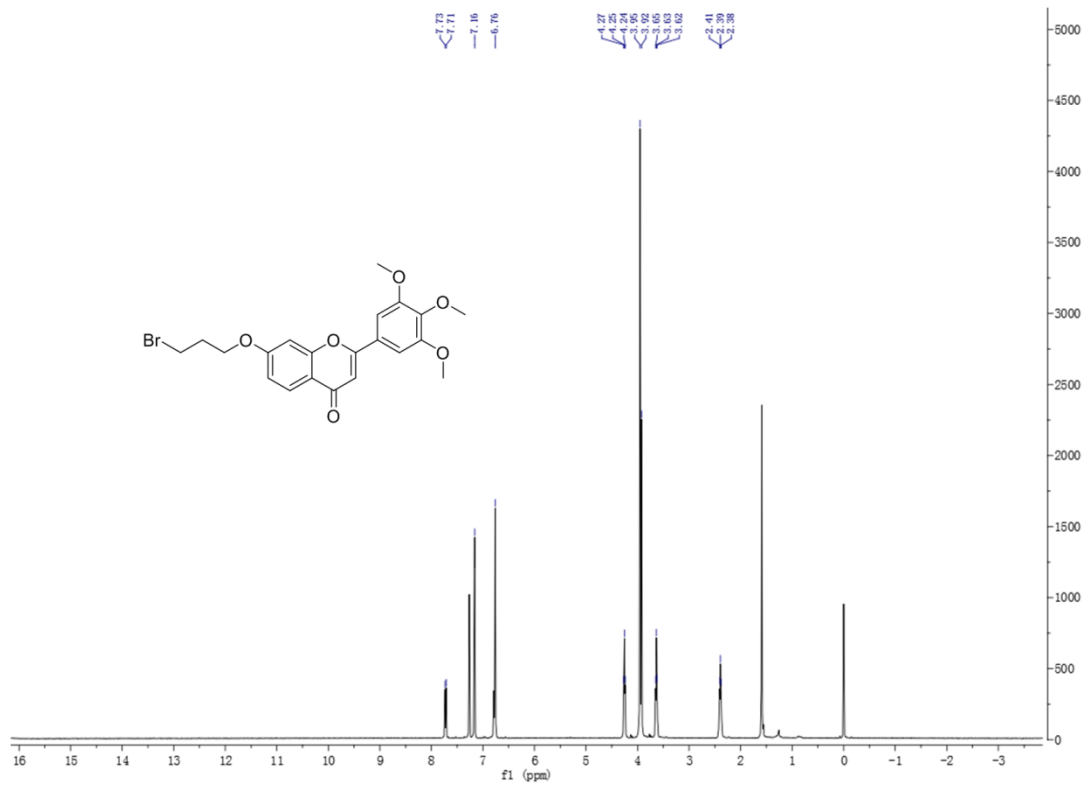

$^1\text{H NMR}$  of compound **4b**

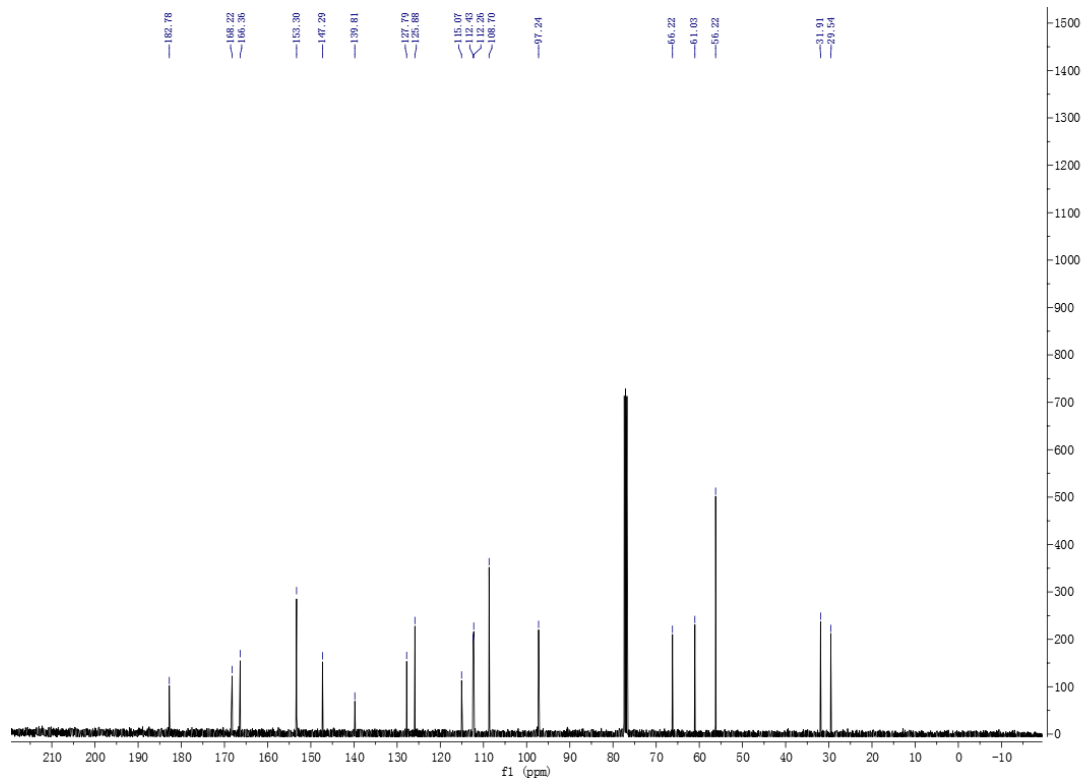

$^{13}\text{C NMR}$  of compound **4b**

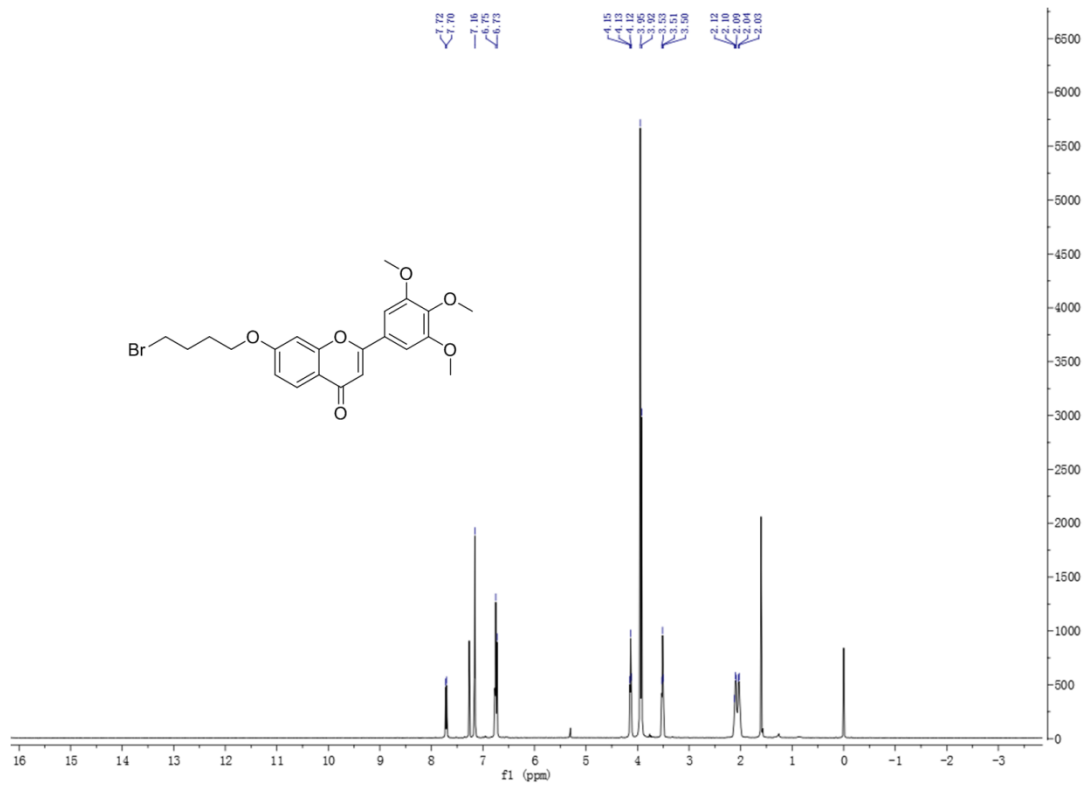

<sup>1</sup>H NMR of compound 4c

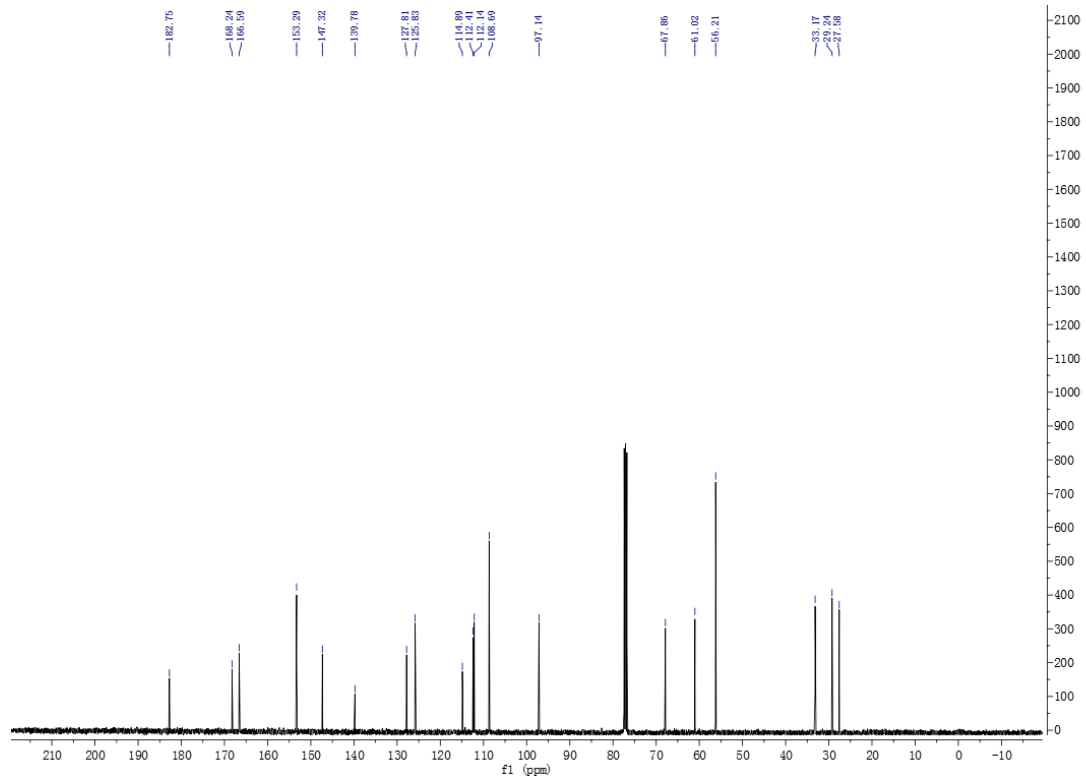

<sup>13</sup>C NMR of compound 4c

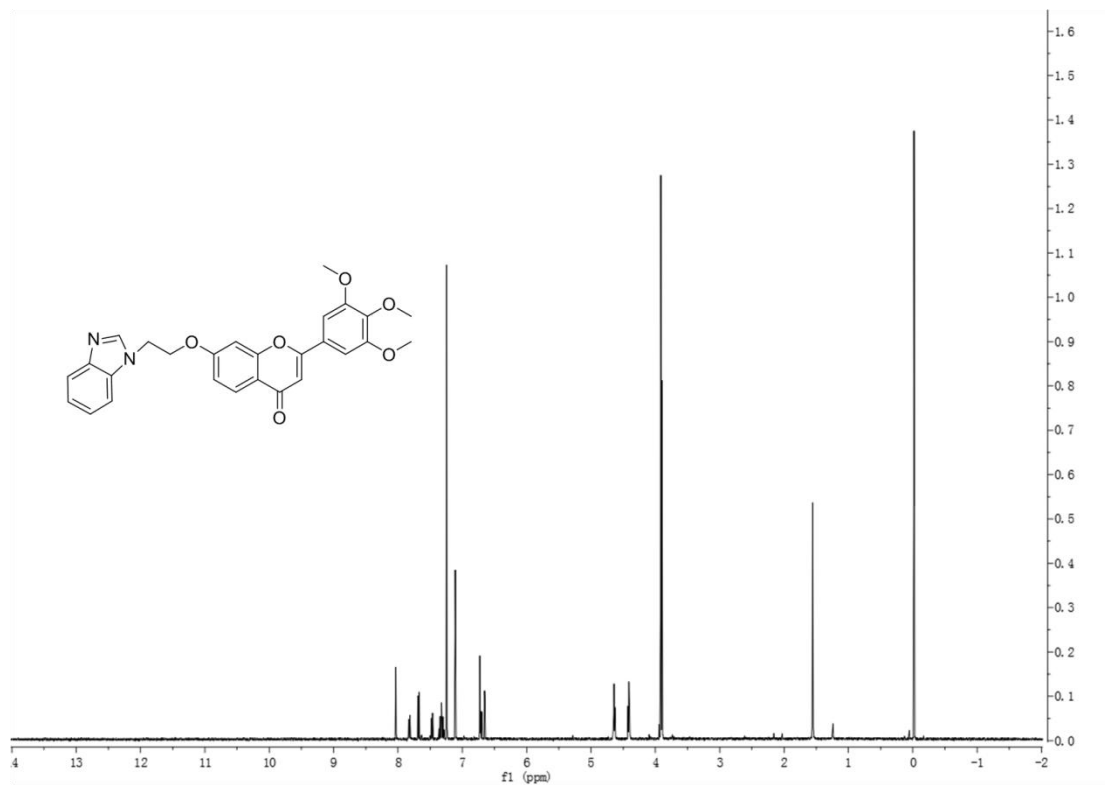

<sup>1</sup>H NMR of compound 5

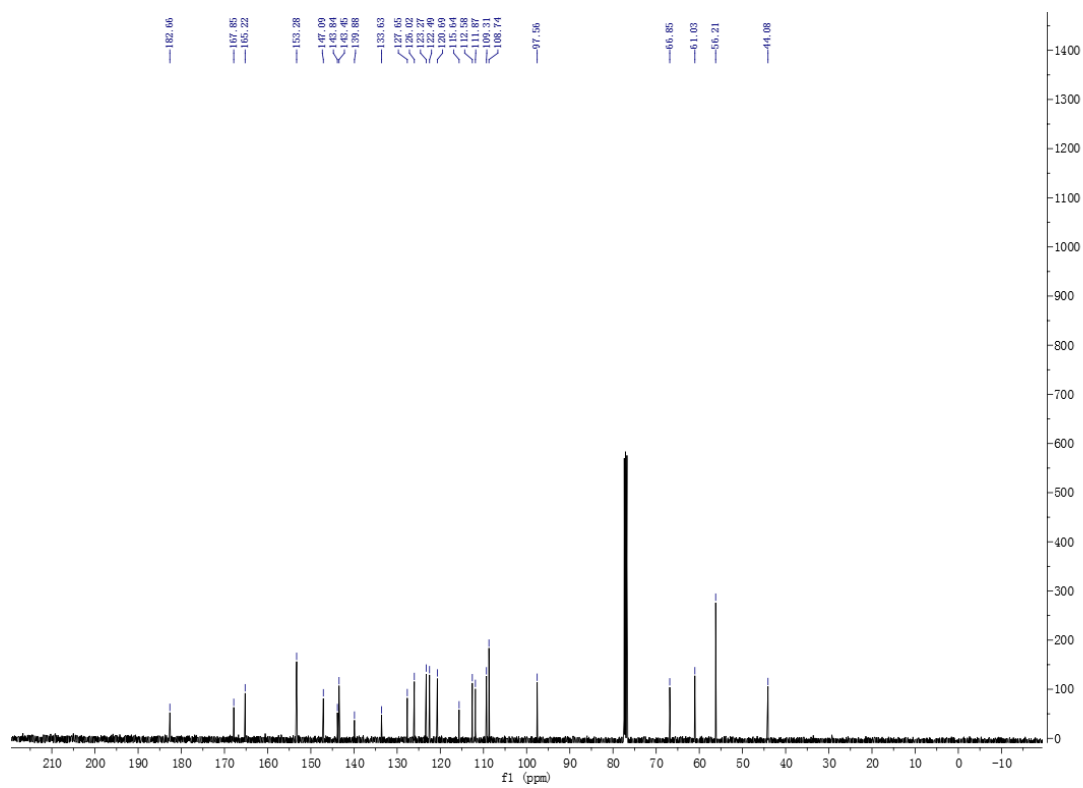

<sup>13</sup>C NMR of compound 5

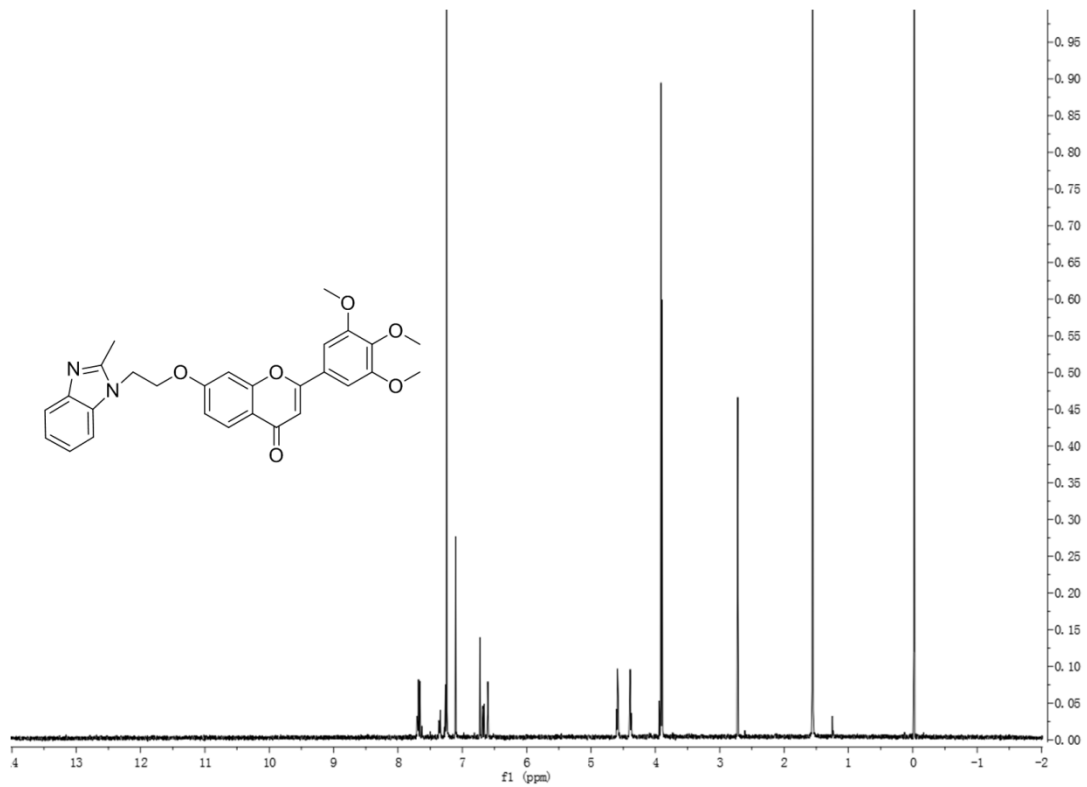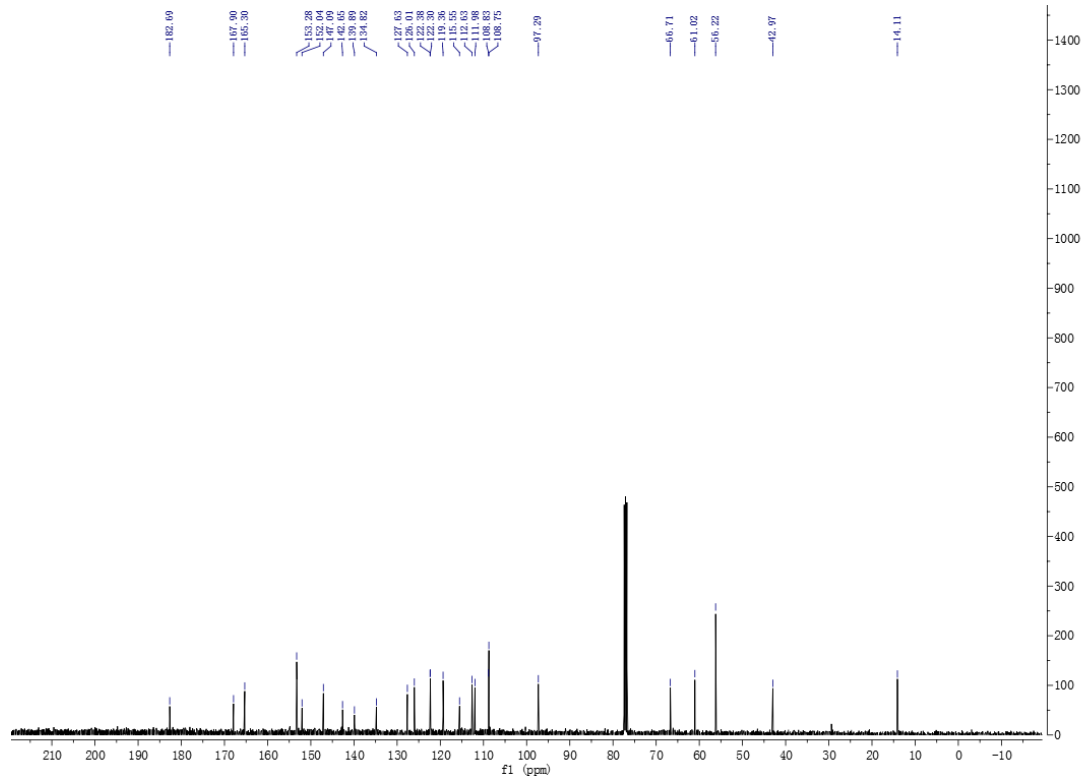

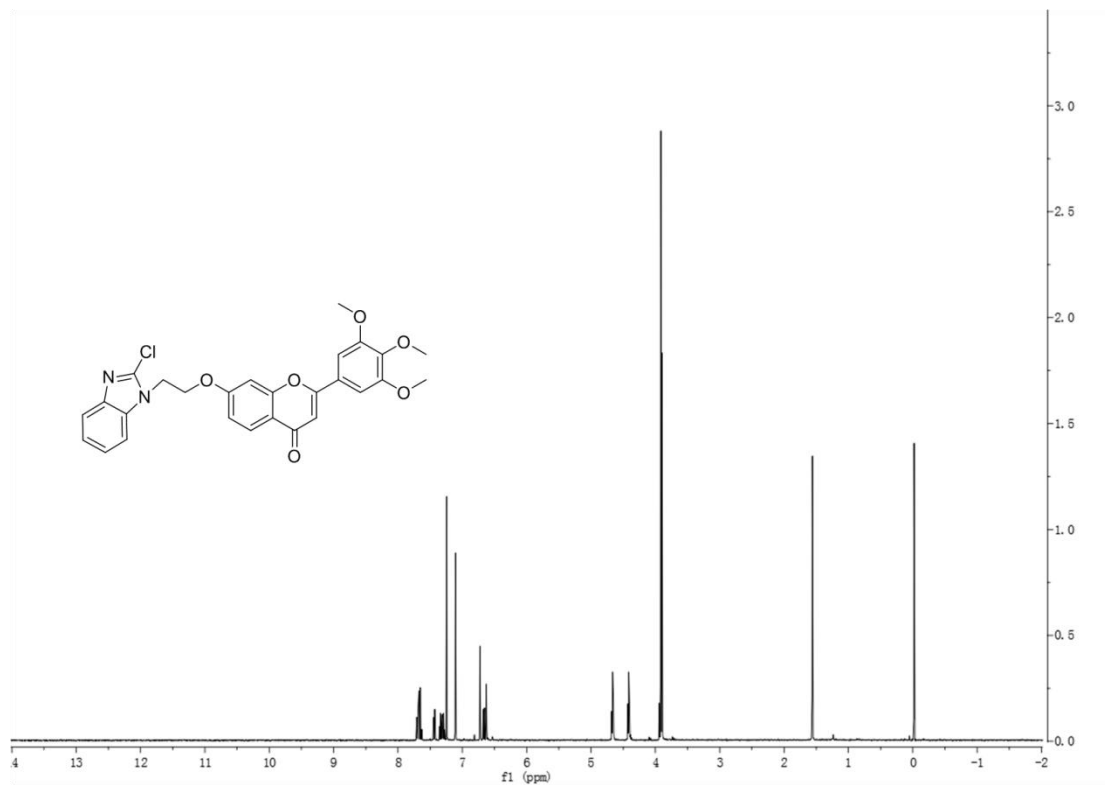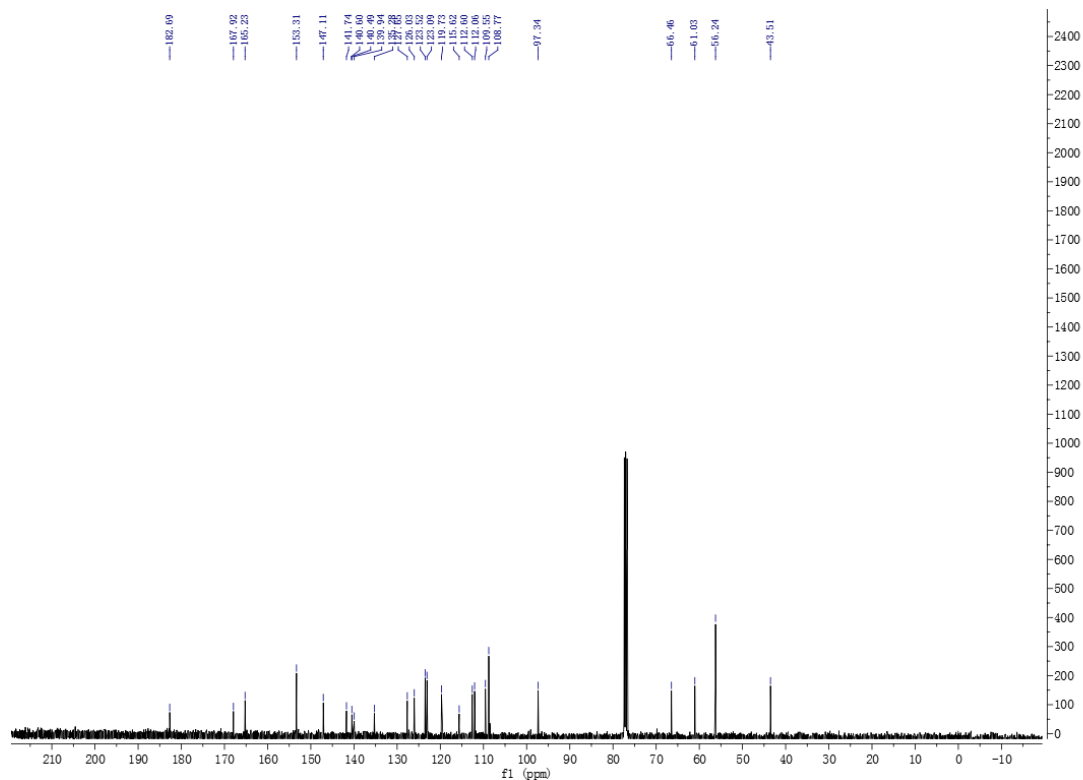



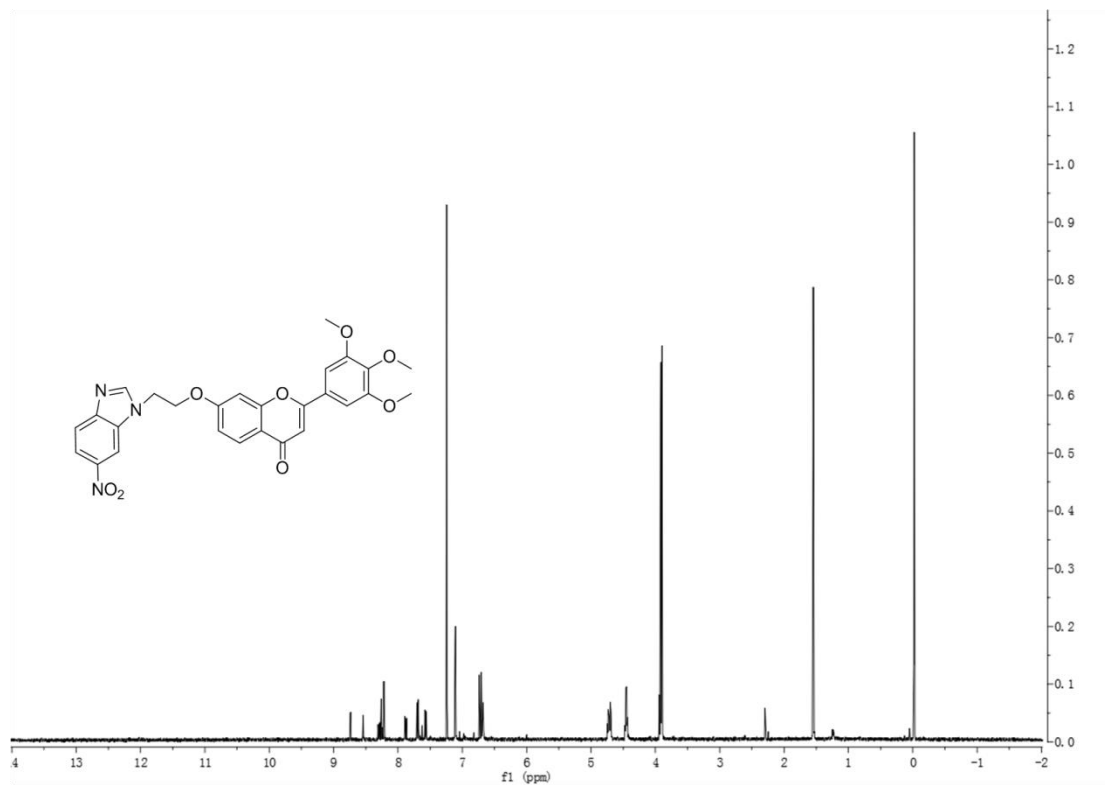

<sup>1</sup>H NMR of compound 8

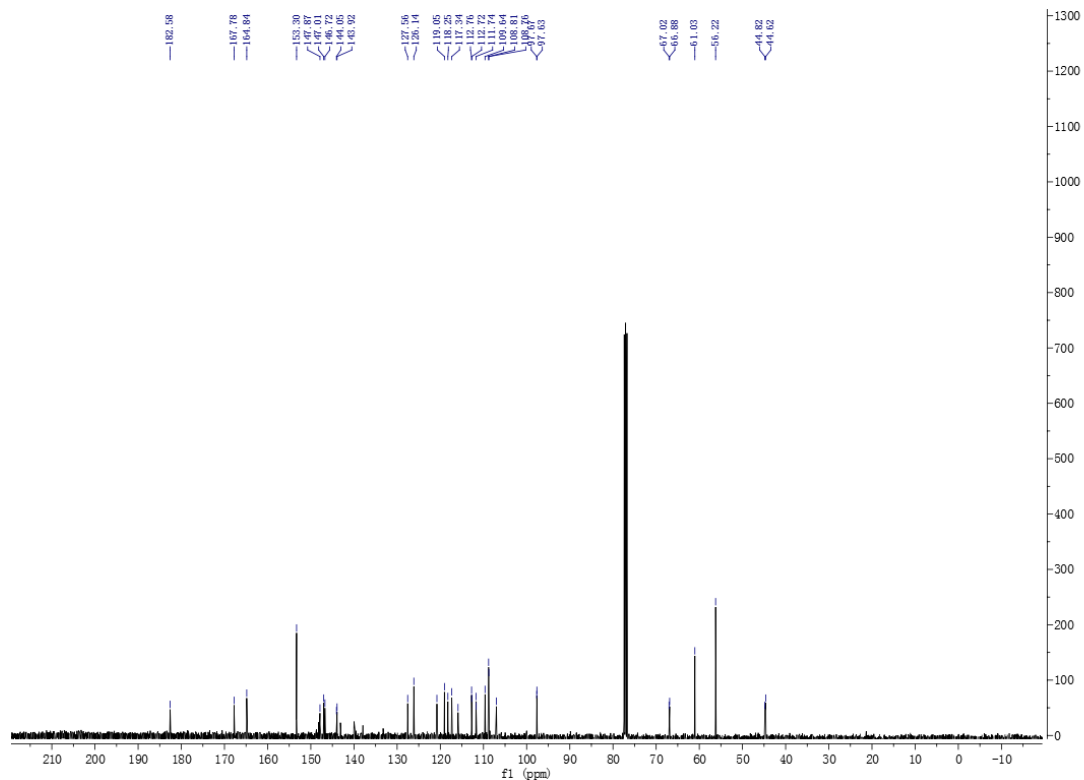

<sup>13</sup>C NMR of compound 8

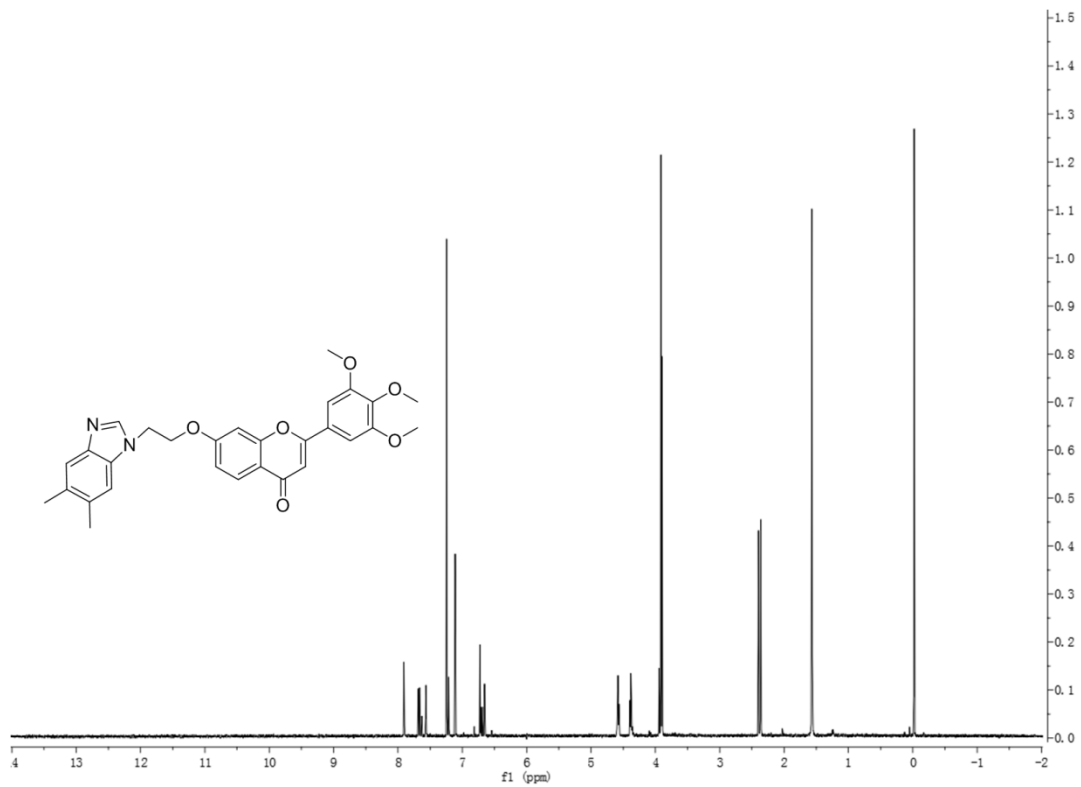

<sup>1</sup>H NMR of compound 9

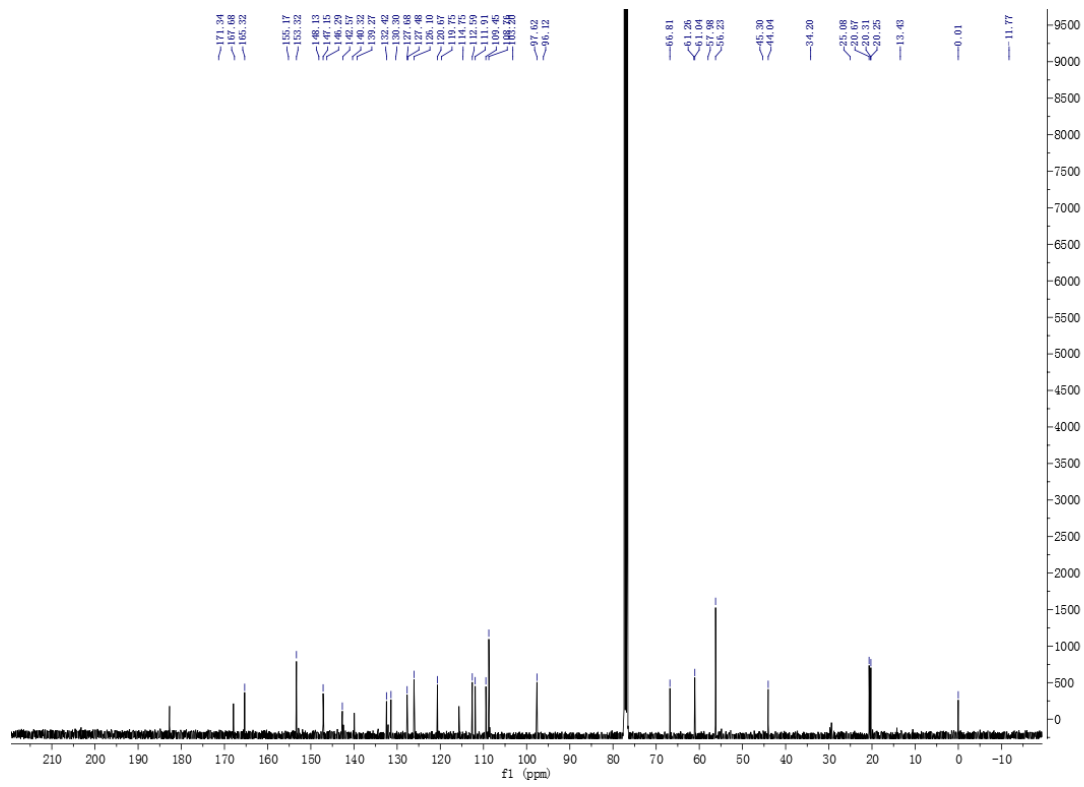

<sup>13</sup>C NMR of compound 9

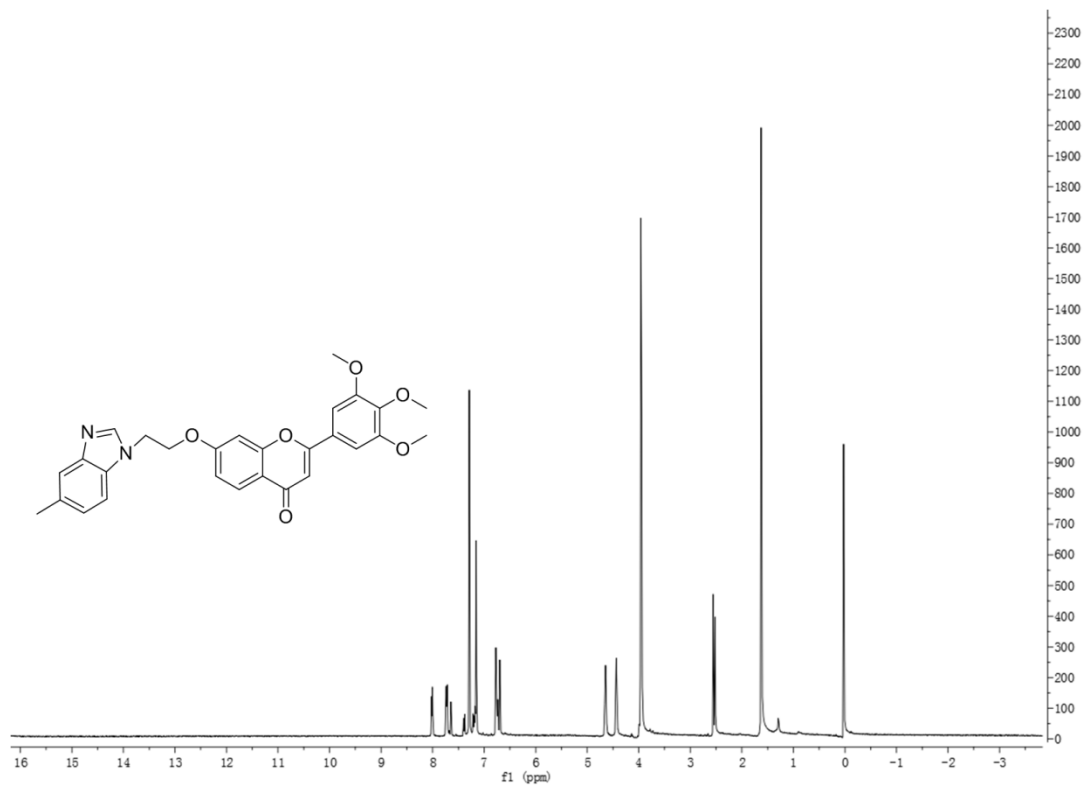

<sup>1</sup>H NMR of compound 10

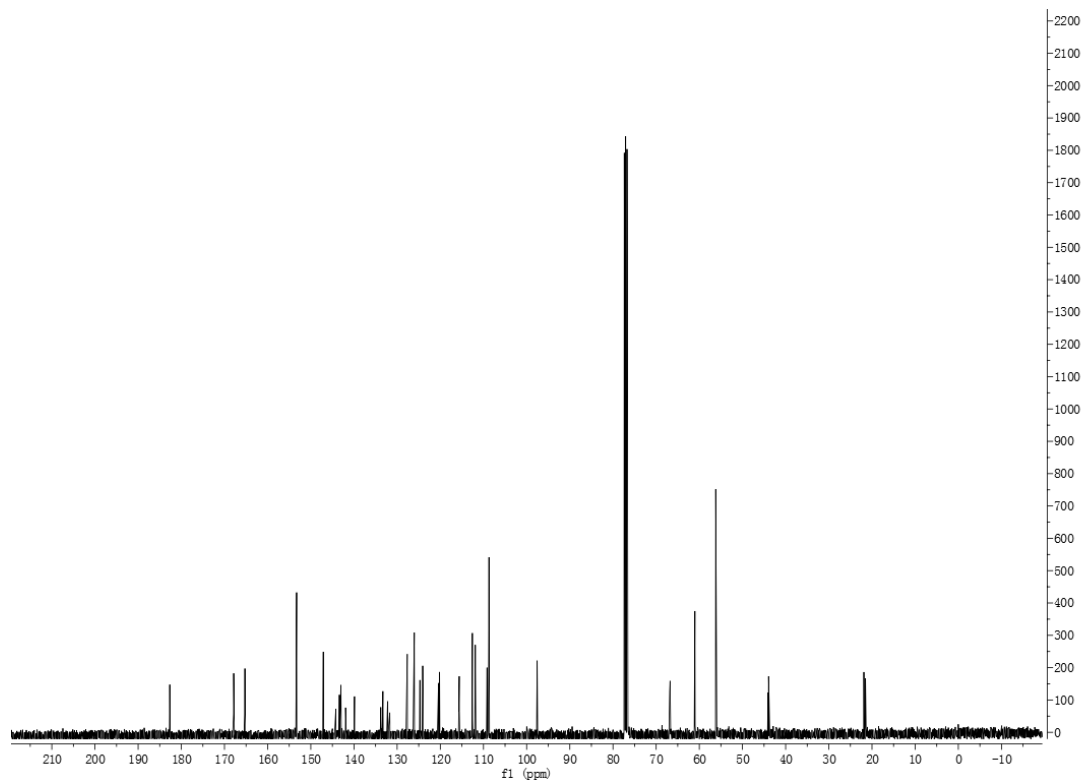

<sup>13</sup>C NMR of compound 10

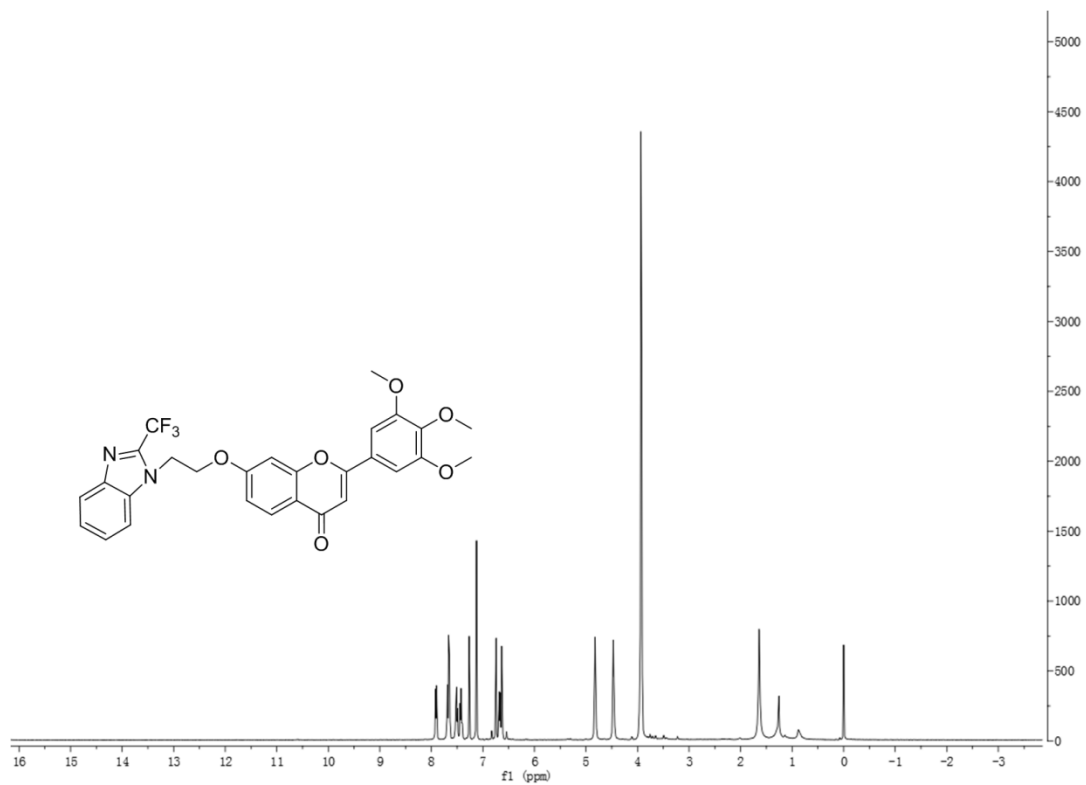

<sup>1</sup>H NMR of compound **11**

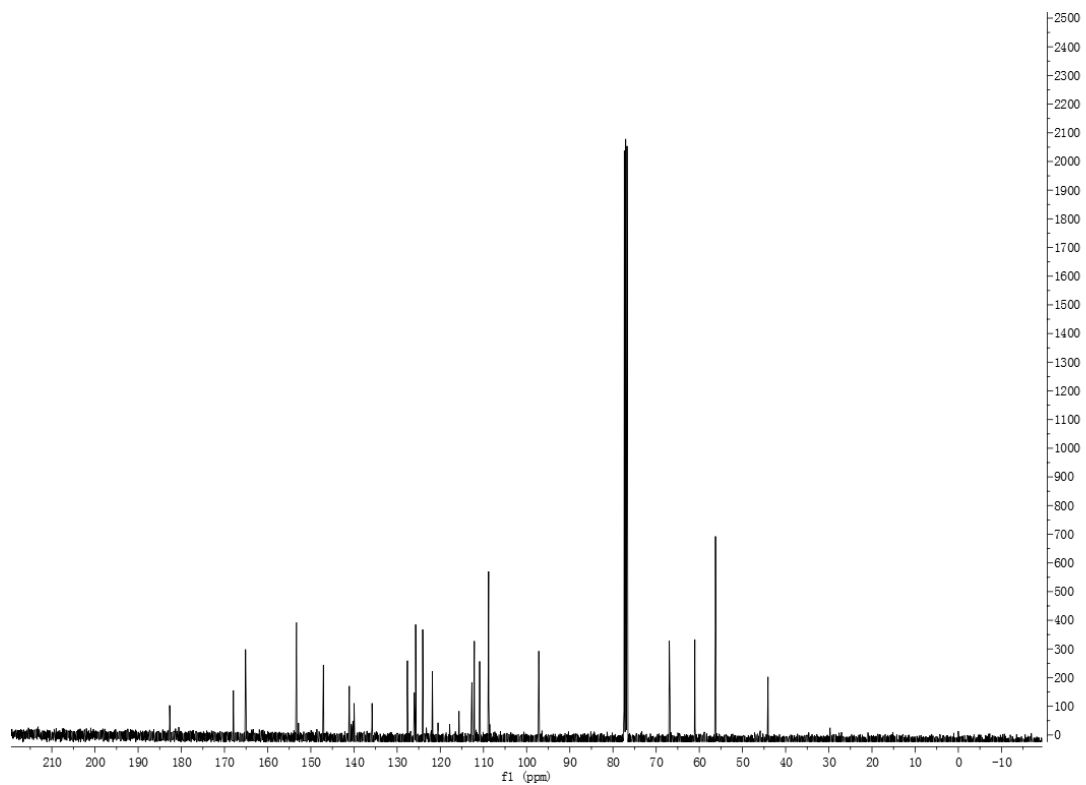

<sup>13</sup>C NMR of compound **11**

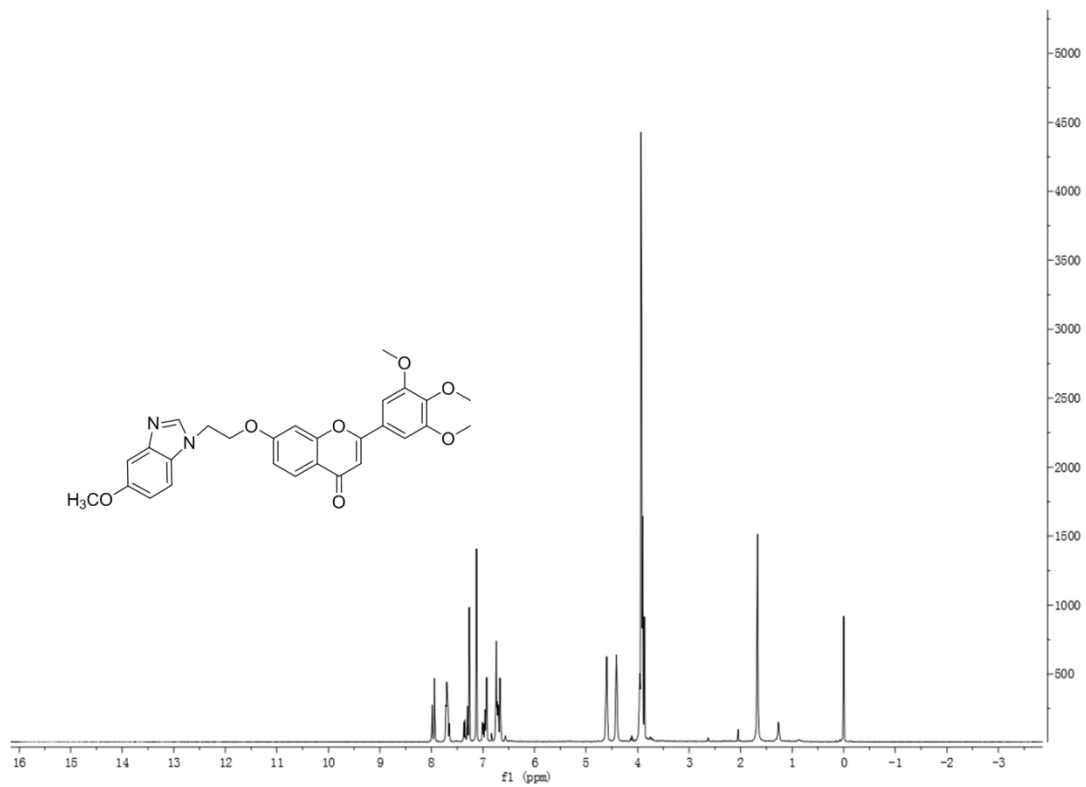

<sup>1</sup>H NMR of compound 12

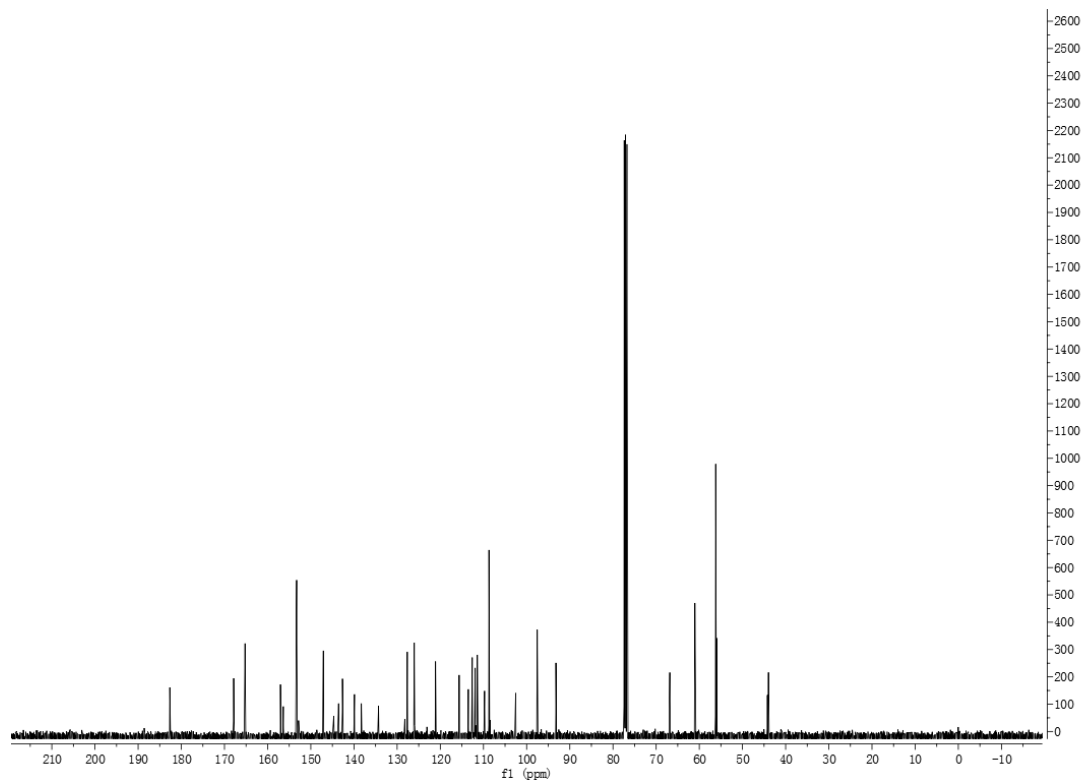

<sup>13</sup>C NMR of compound 12

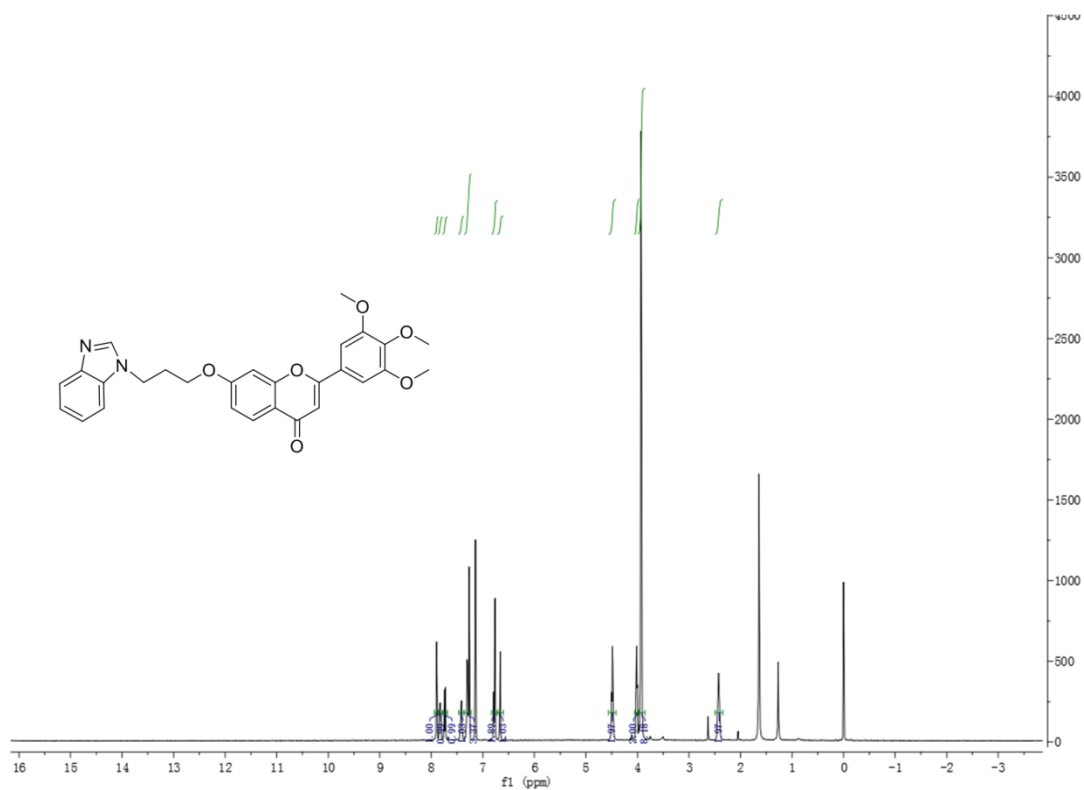

<sup>1</sup>H NMR of compound 13

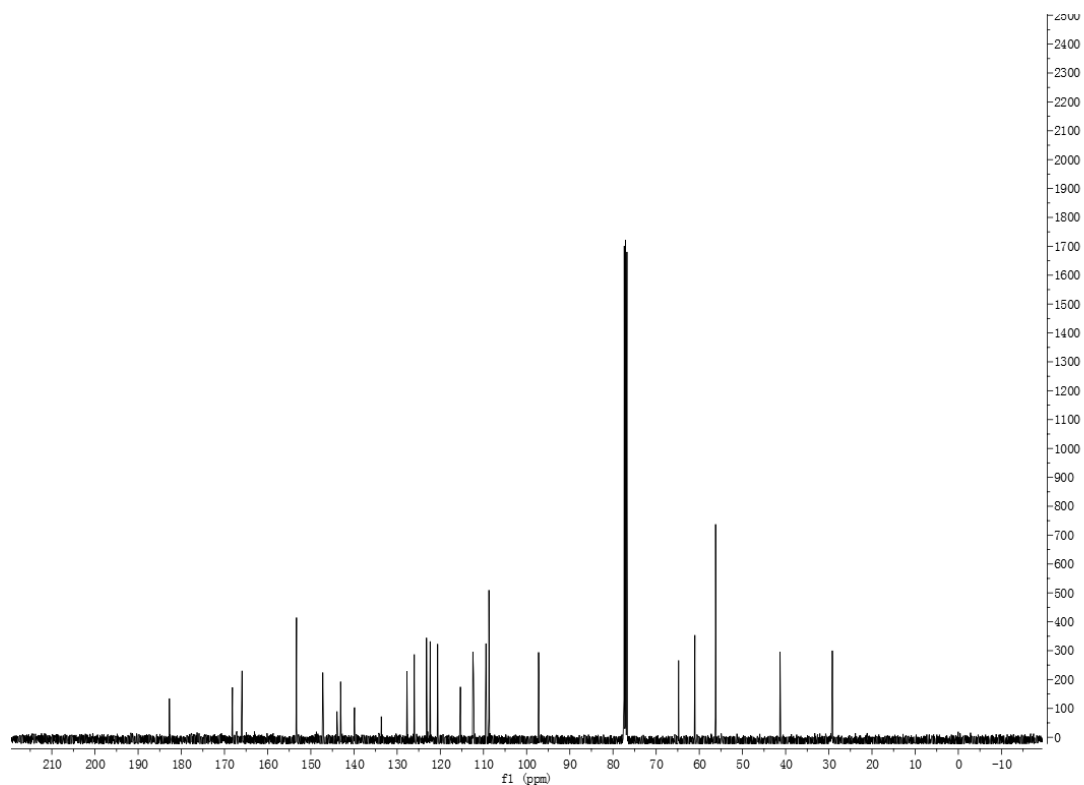

<sup>13</sup>C NMR of compound 13

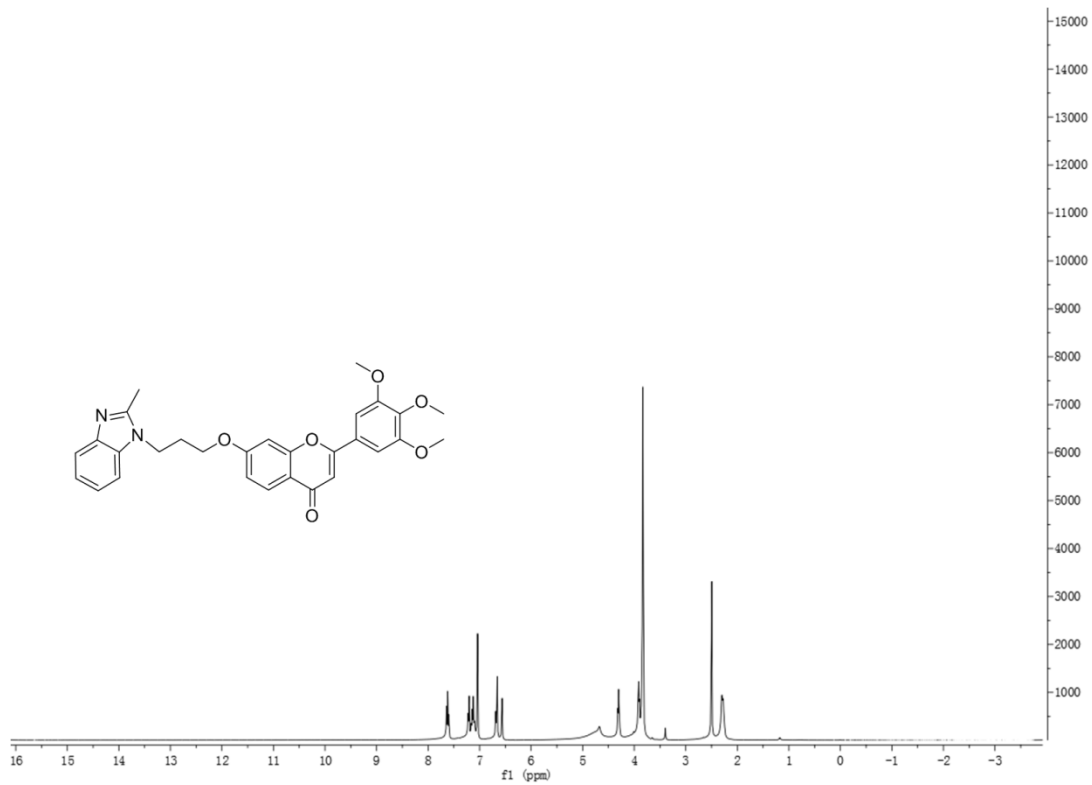

<sup>1</sup>H NMR of compound 14

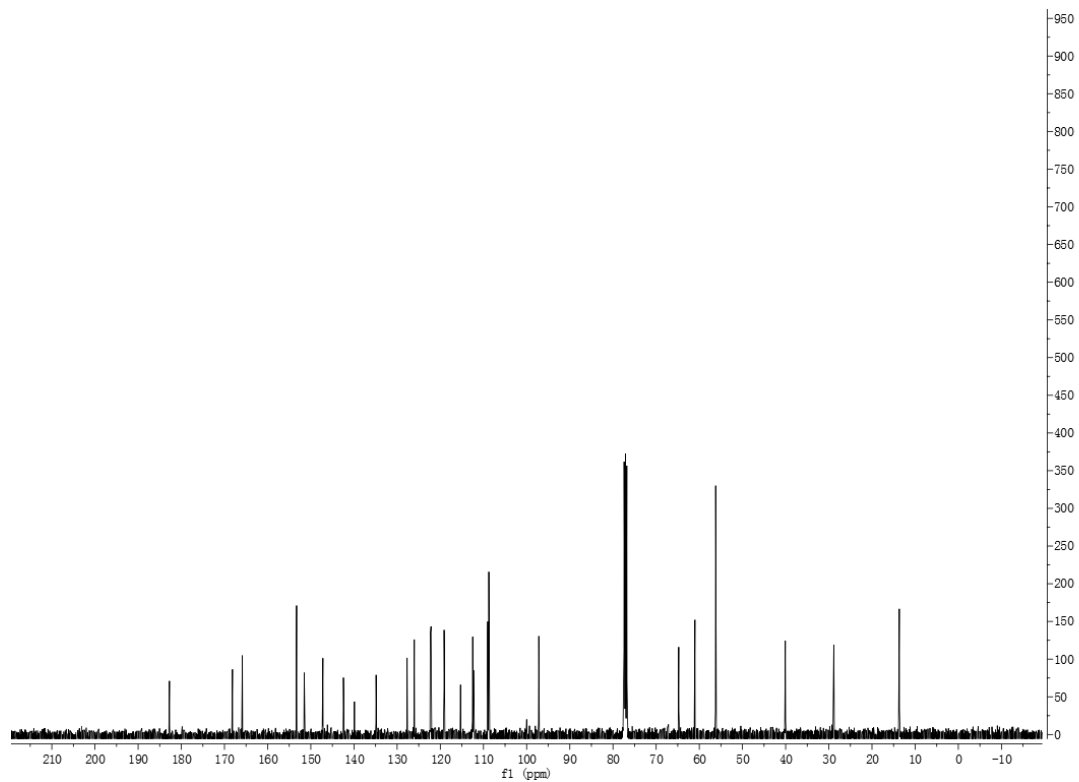

<sup>13</sup>C NMR of compound 14

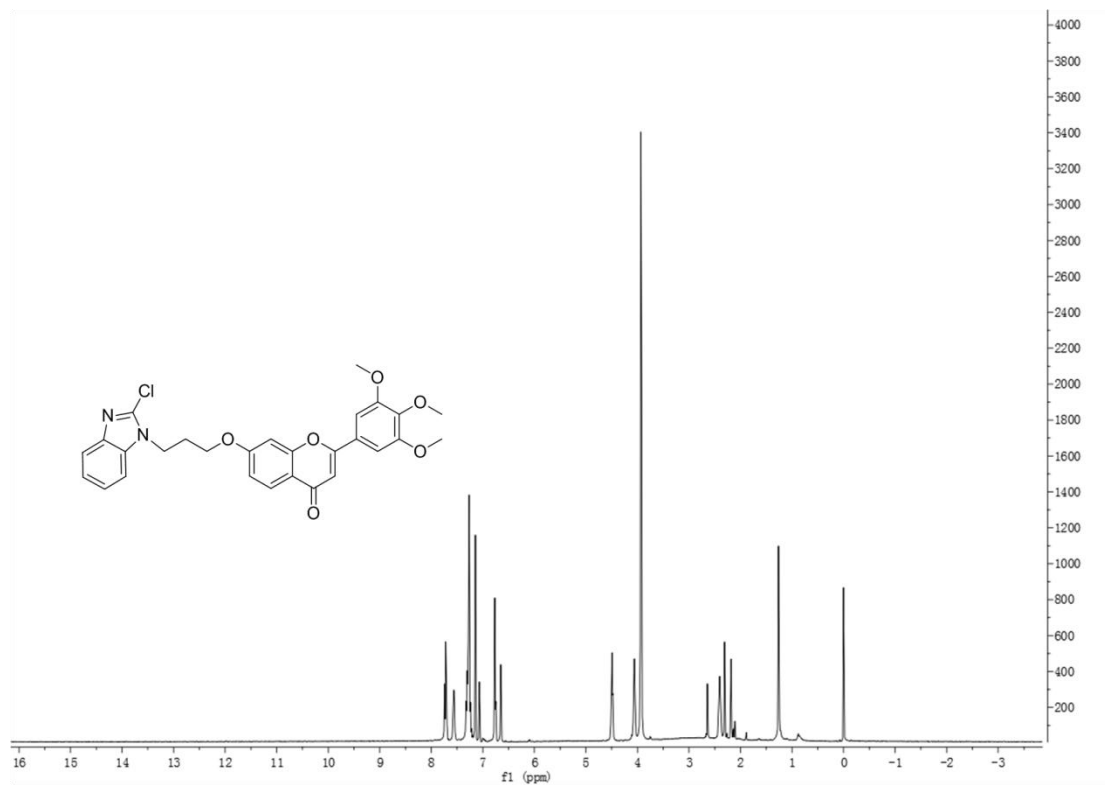

<sup>1</sup>H NMR of compound 15

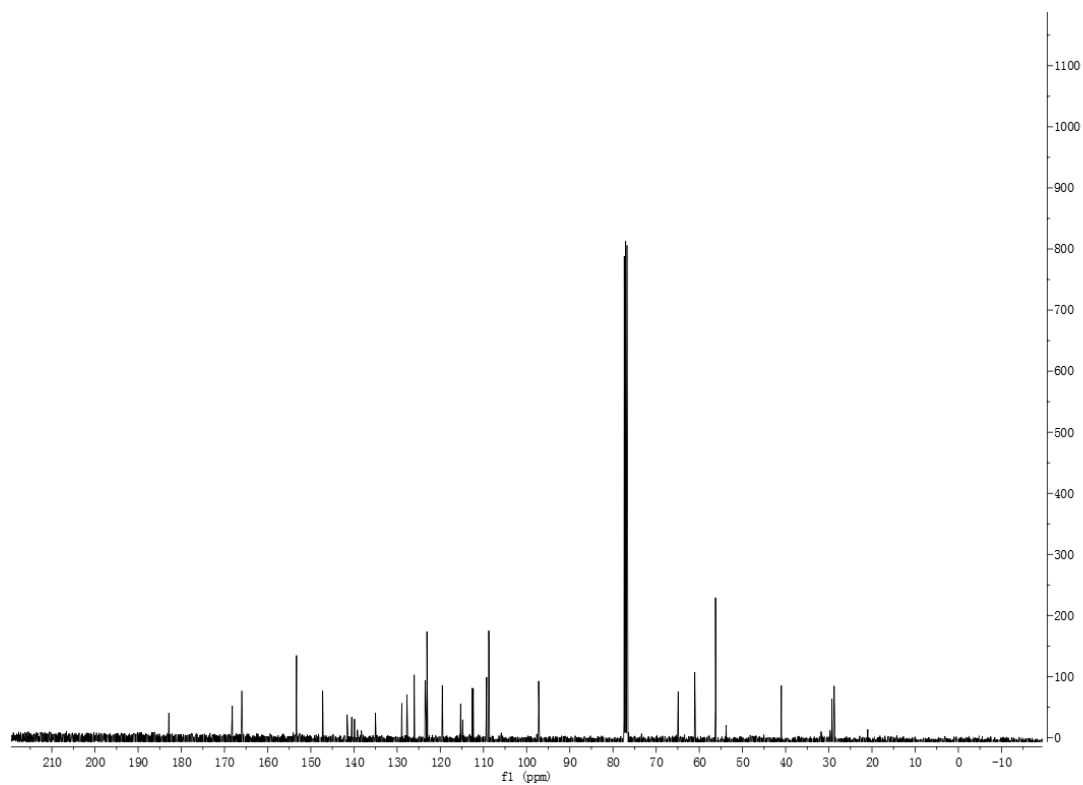

<sup>13</sup>C NMR of compound 15



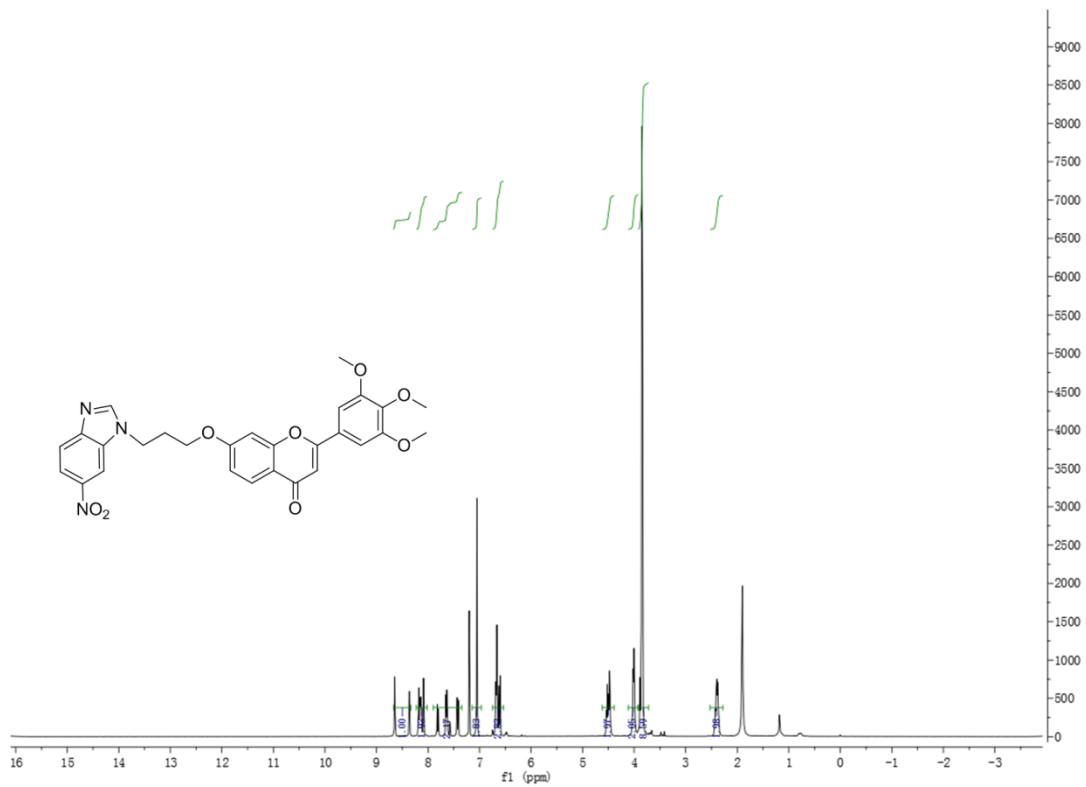

$^1\text{H}$  NMR of compound 16

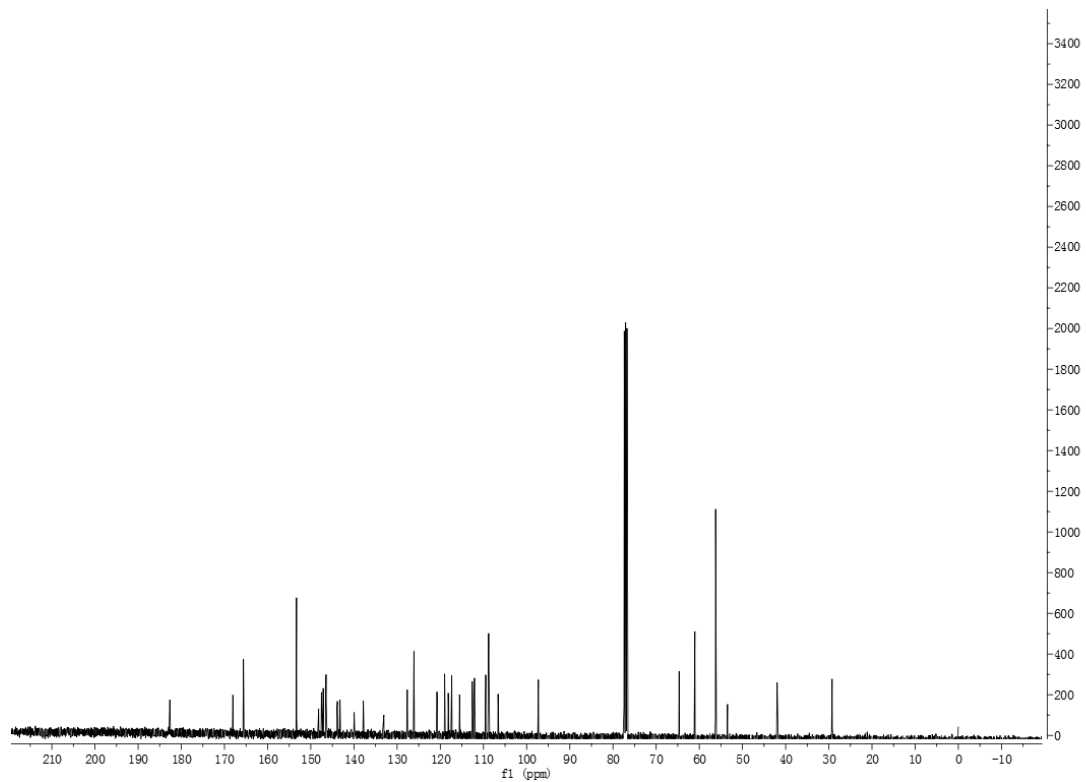

$^{13}\text{C}$  NMR of compound 16

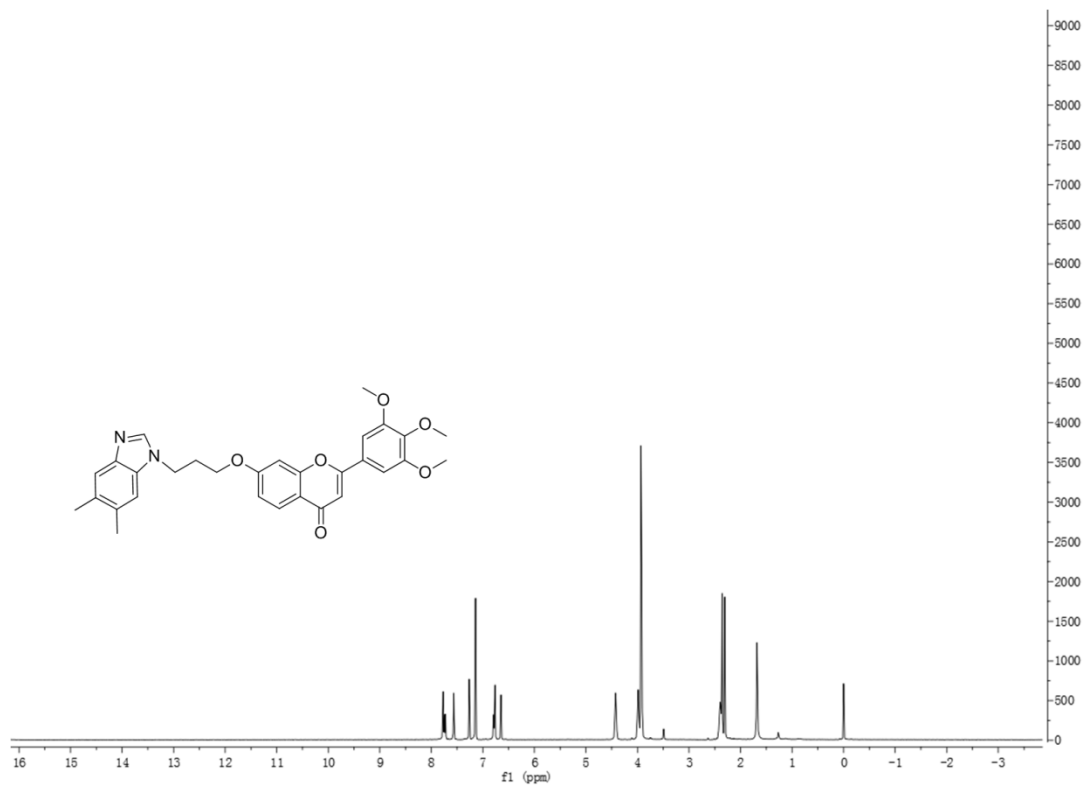

$^1\text{H}$  NMR of compound **17**

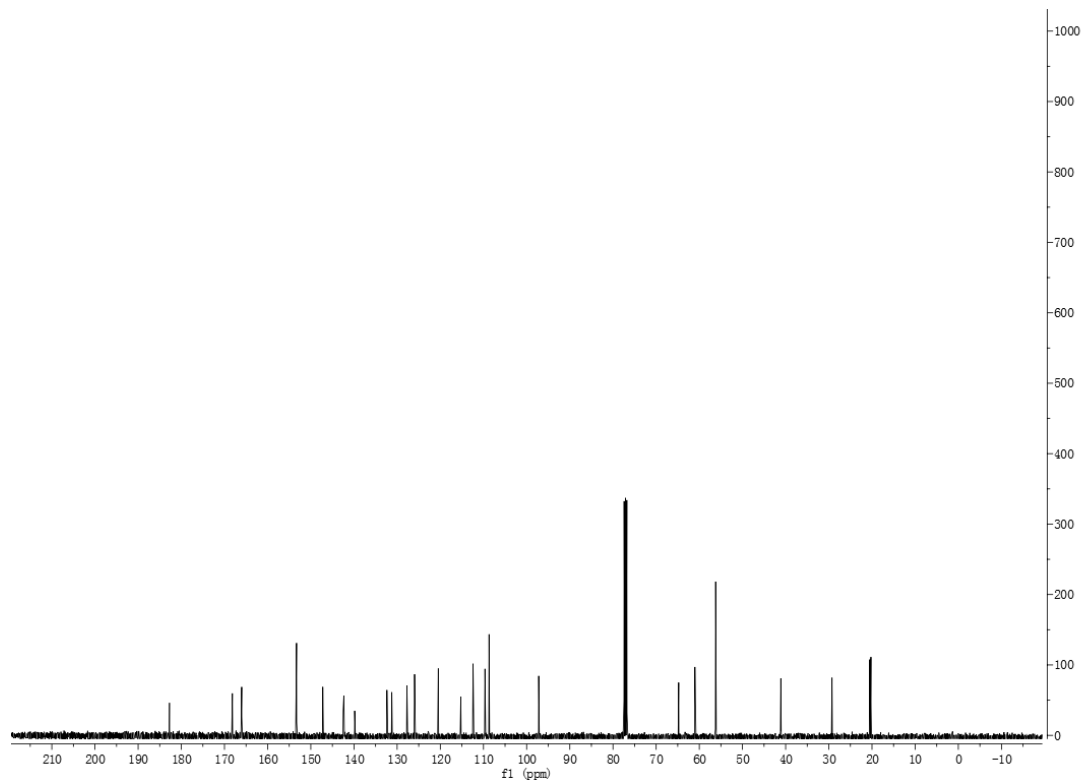

$^{13}\text{C}$  NMR of compound **17**

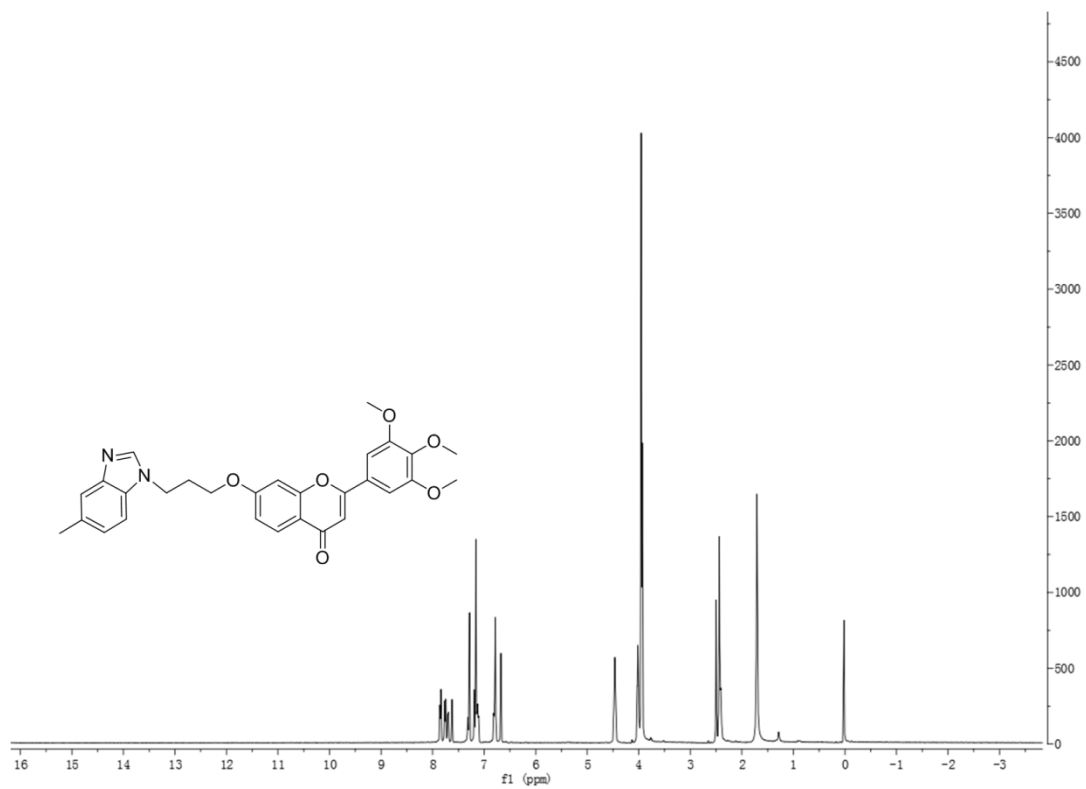

<sup>1</sup>H NMR of compound 18

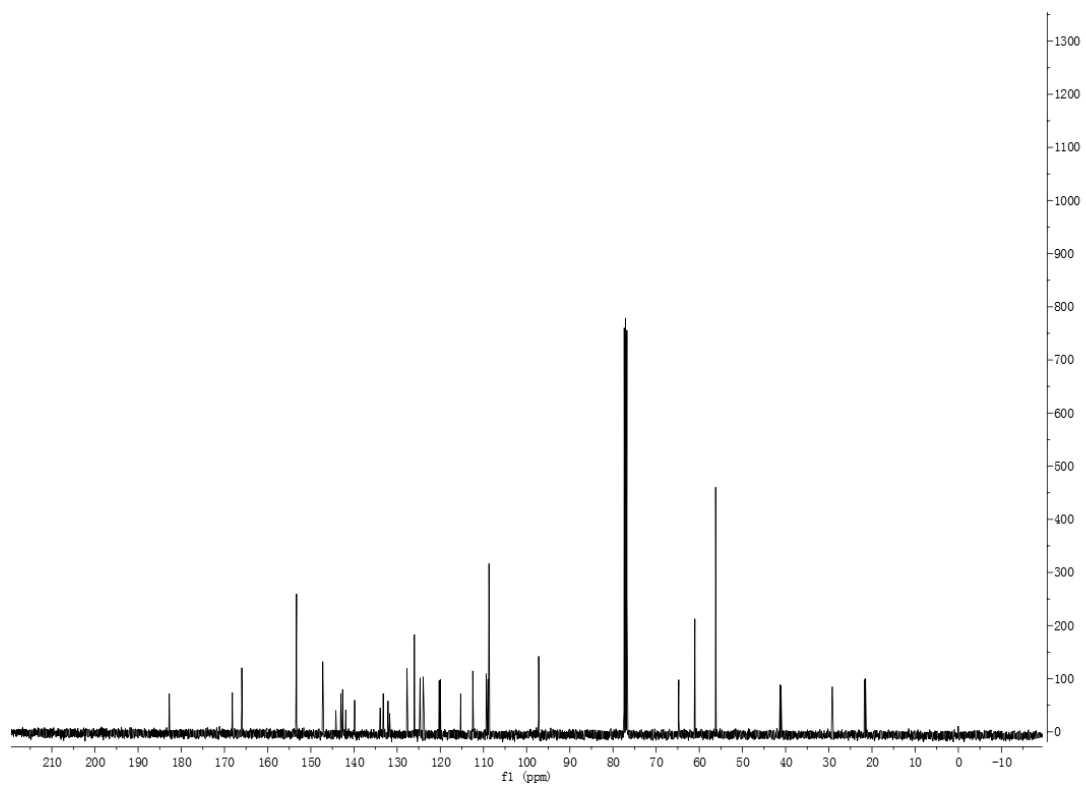

<sup>13</sup>C NMR of compound 18

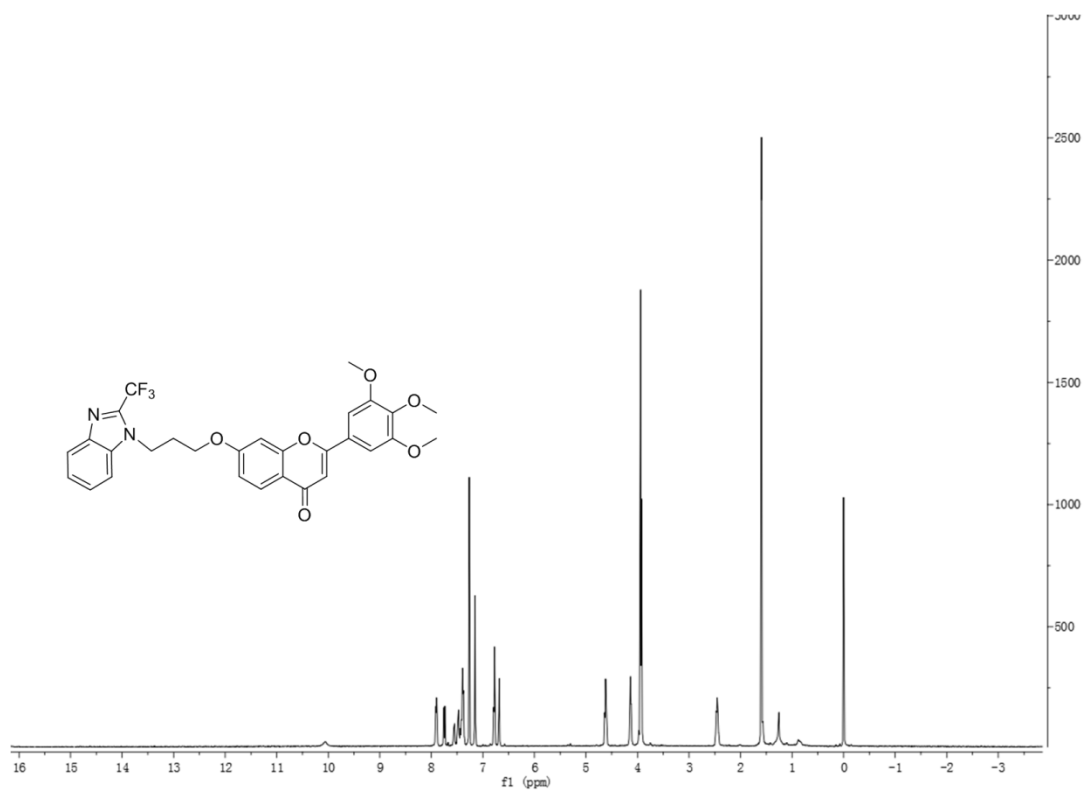

<sup>1</sup>H NMR of compound 19

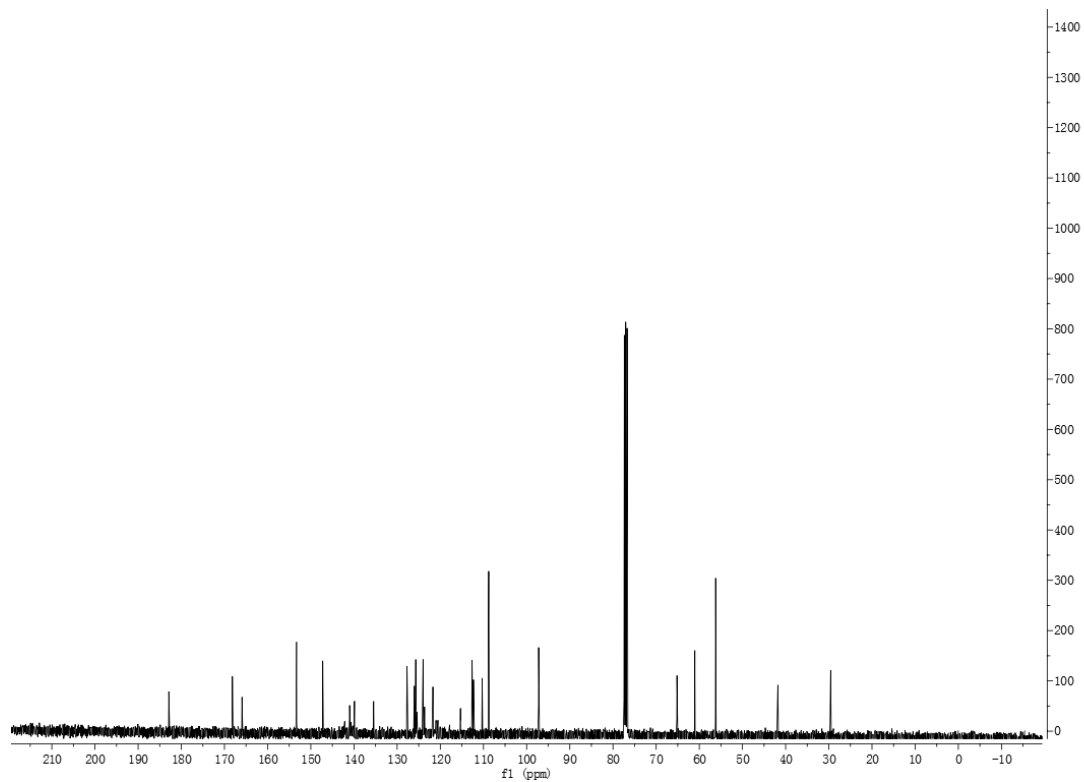

<sup>13</sup>C NMR of compound 19

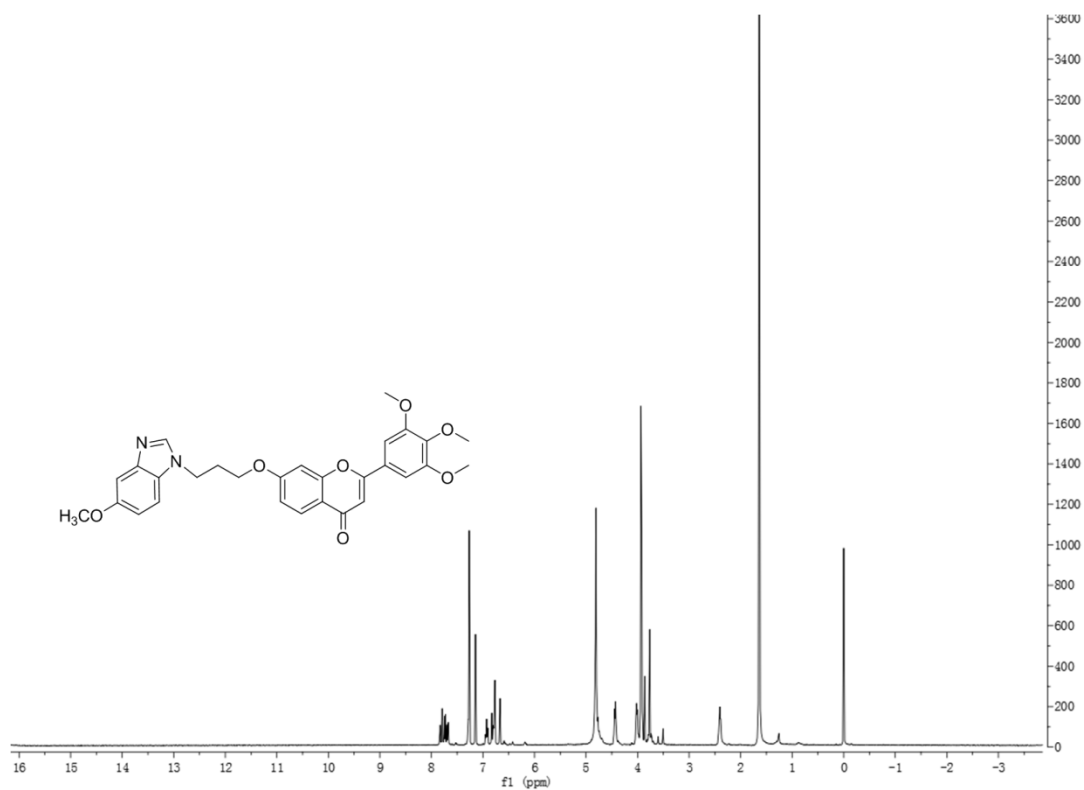

<sup>1</sup>H NMR of compound 20

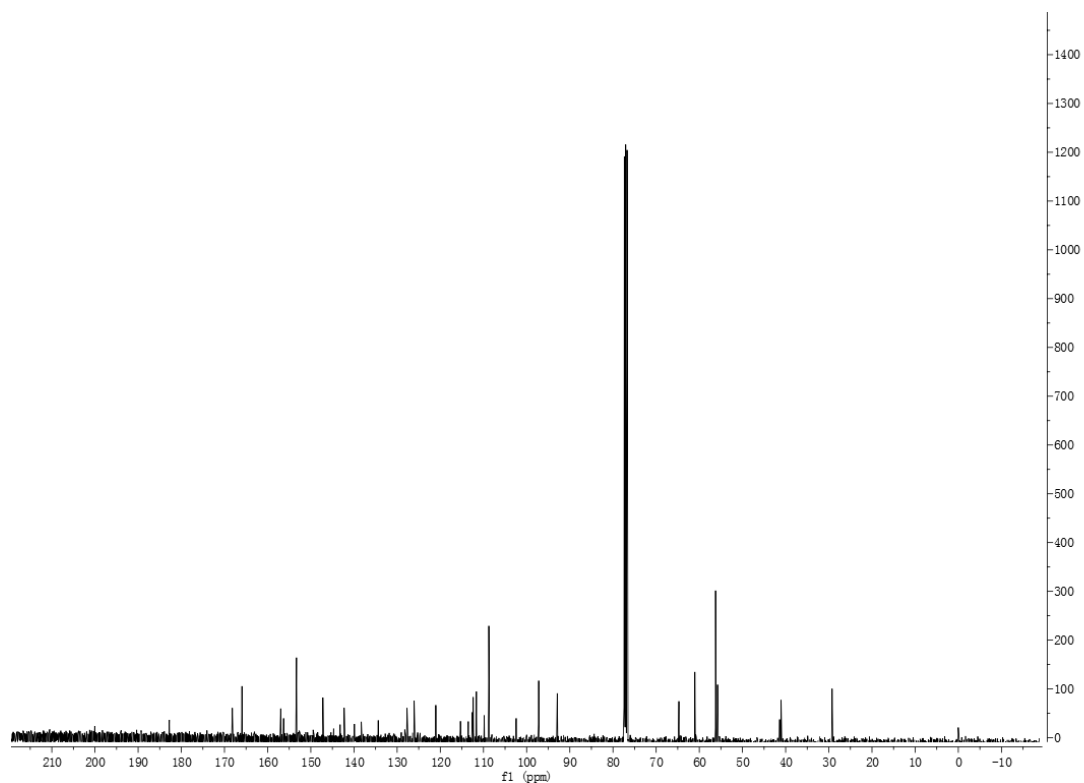

<sup>13</sup>C NMR of compound 20

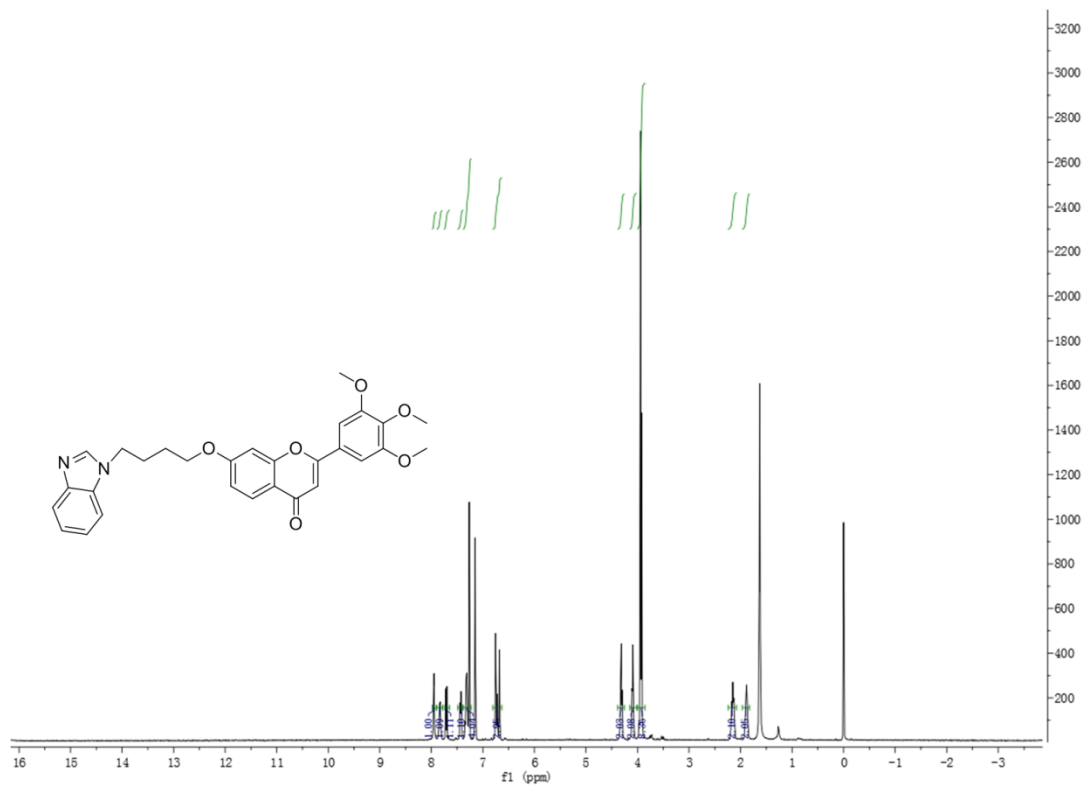

$^1\text{H}$  NMR of compound **21**

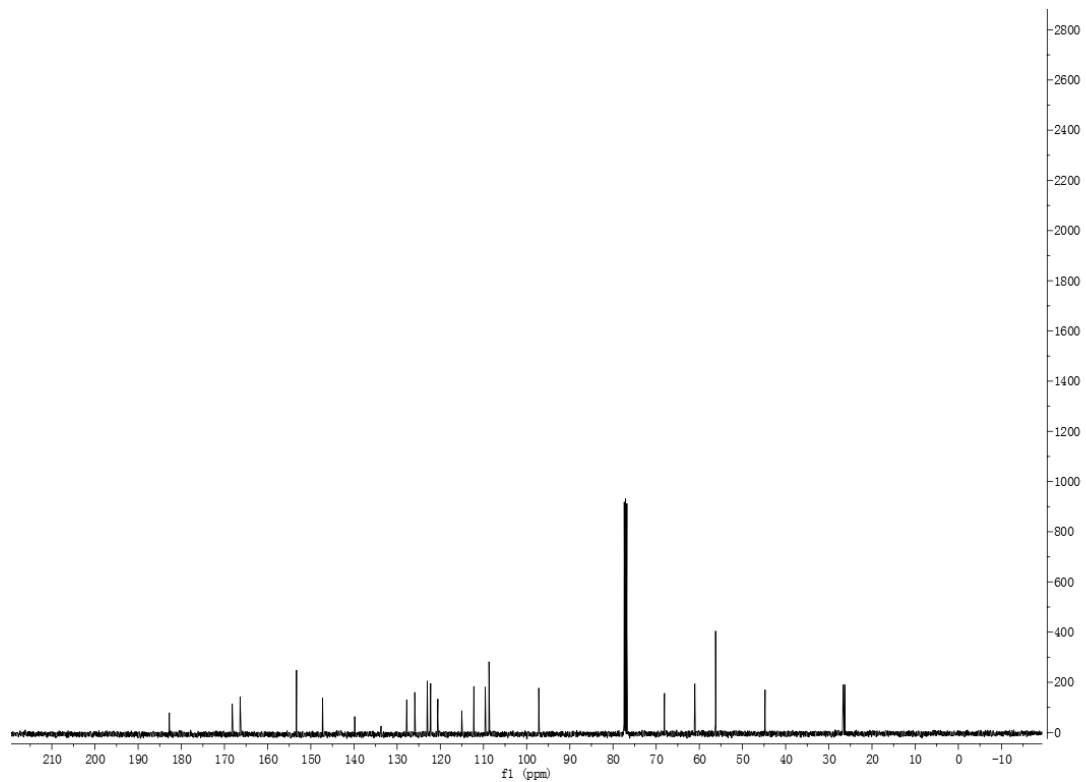

$^{13}\text{C}$  NMR of compound **21**

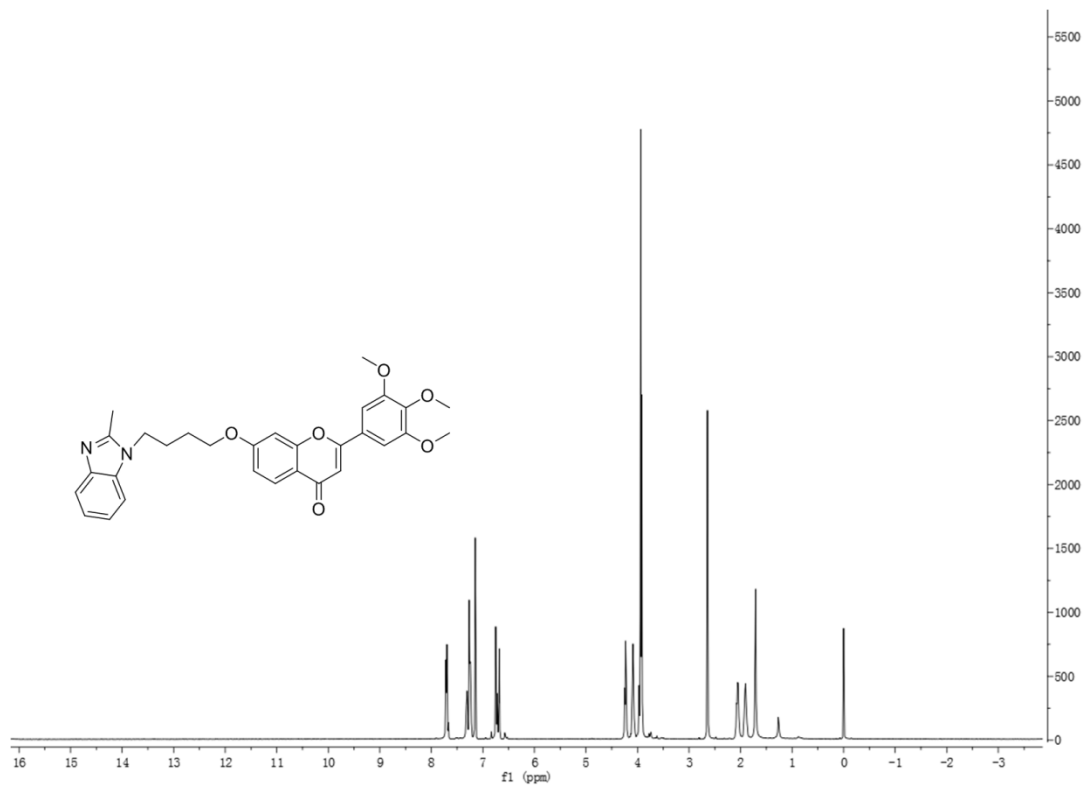

<sup>1</sup>H NMR of compound 22

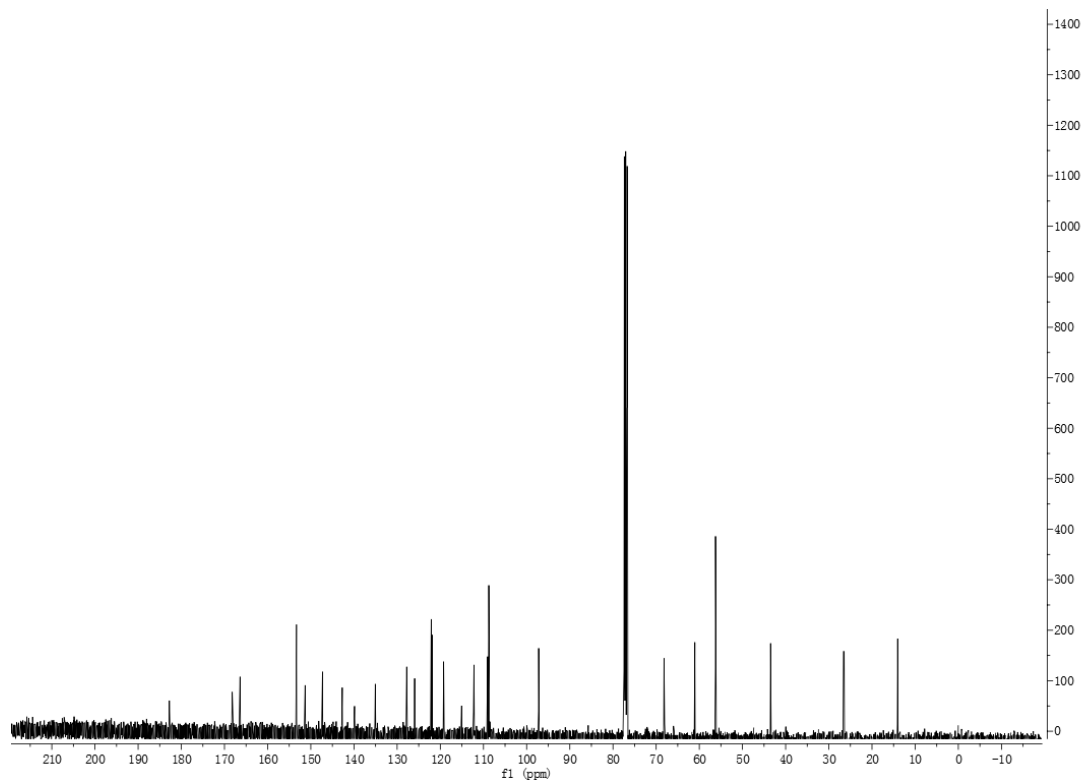

<sup>13</sup>C NMR of compound 22

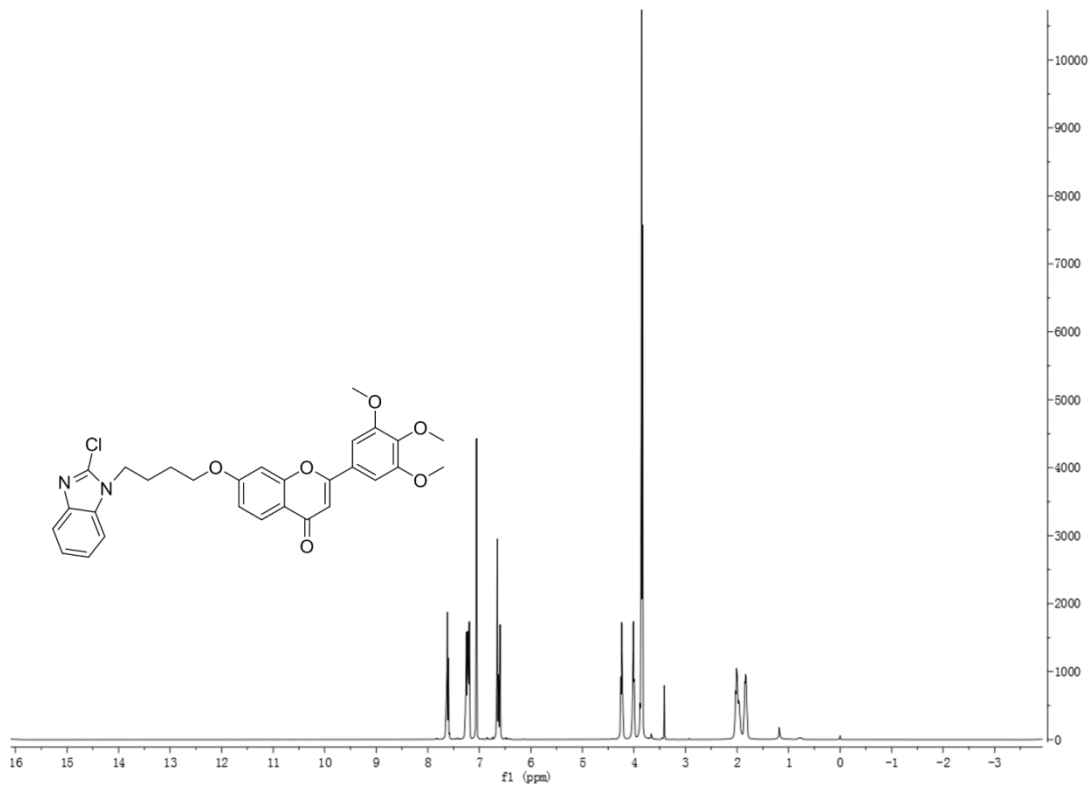

<sup>1</sup>H NMR of compound 23

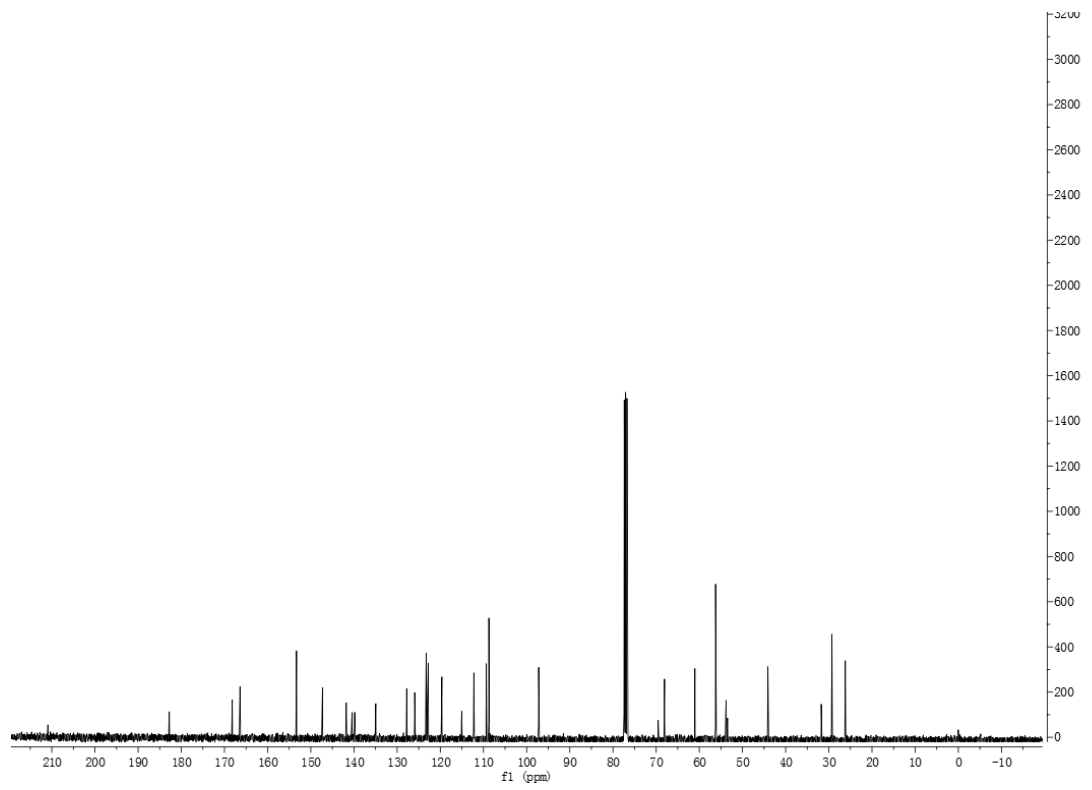

<sup>13</sup>C NMR of compound 23



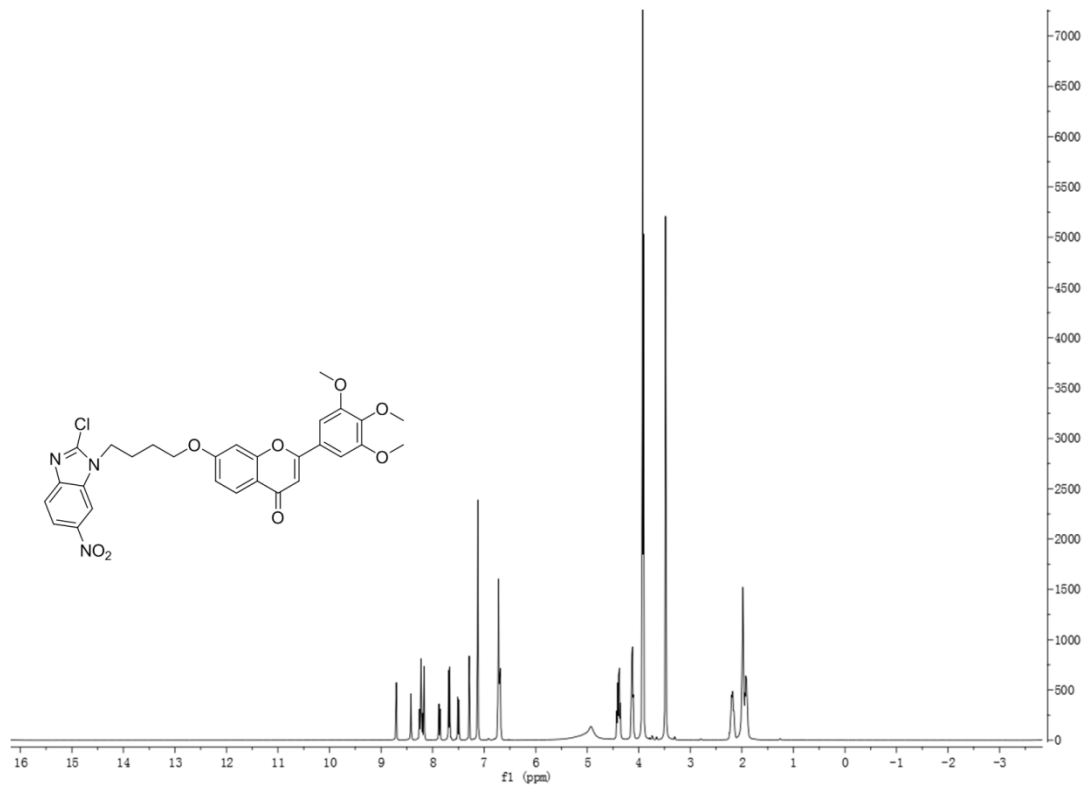

<sup>1</sup>H NMR of compound 24

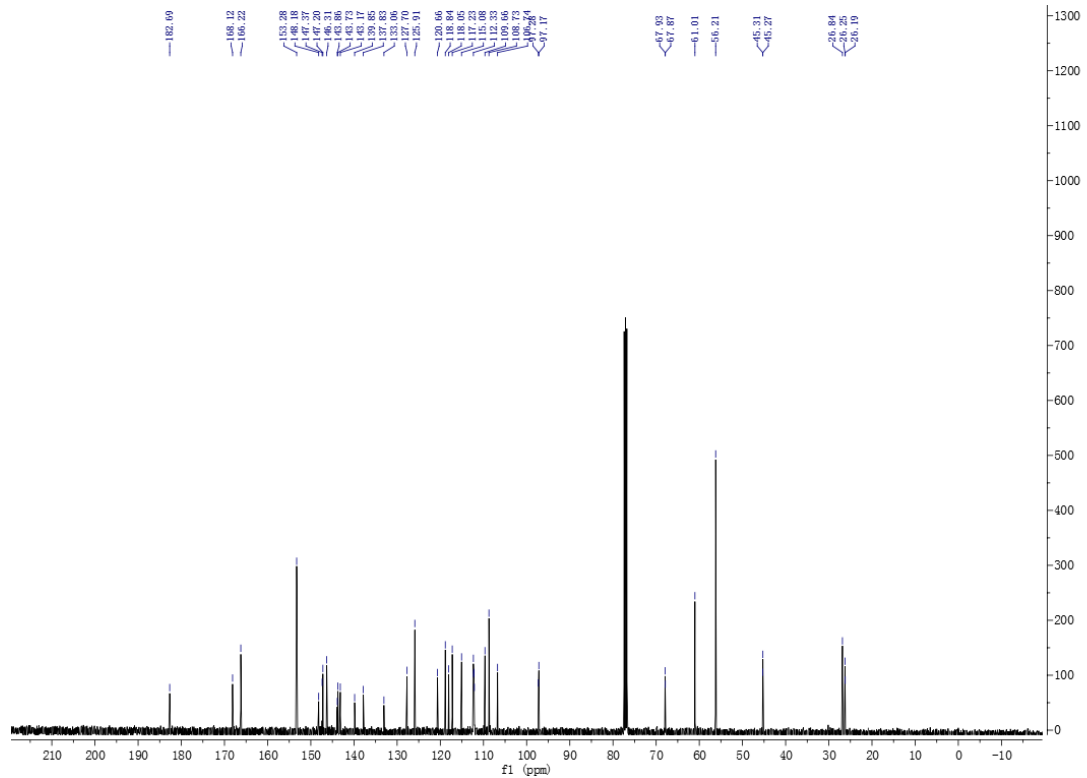

<sup>13</sup>C NMR of compound 24

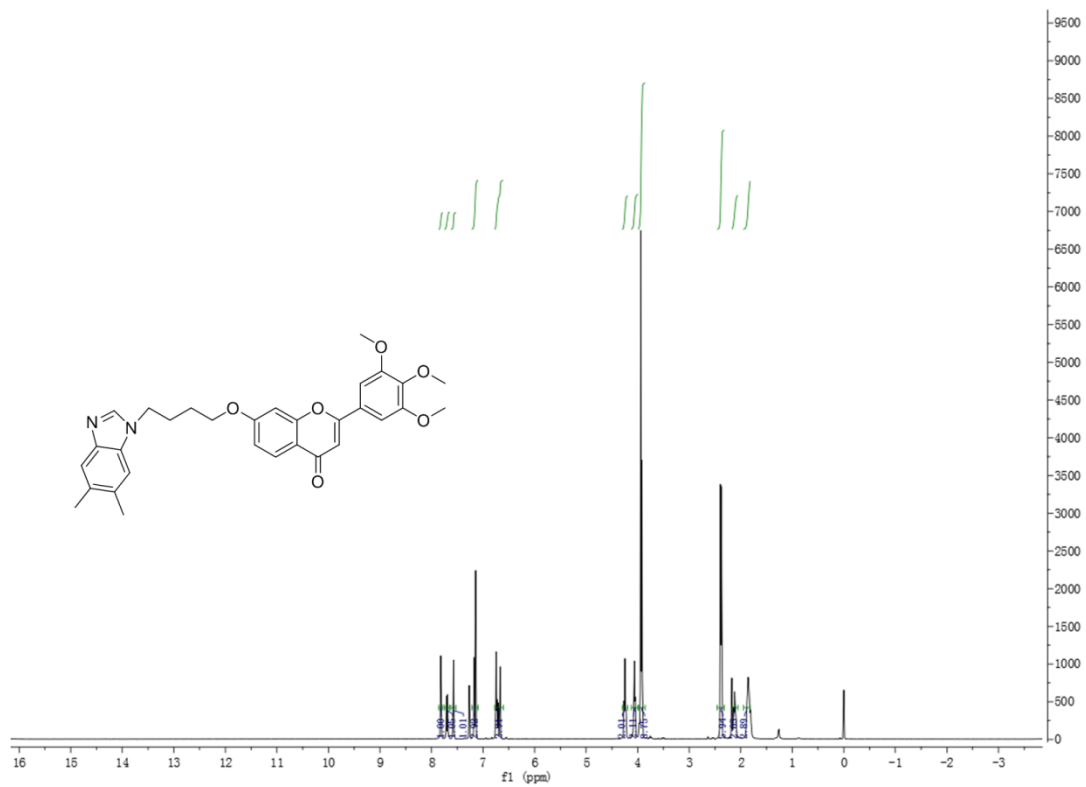

$^1\text{H}$  NMR of compound 25

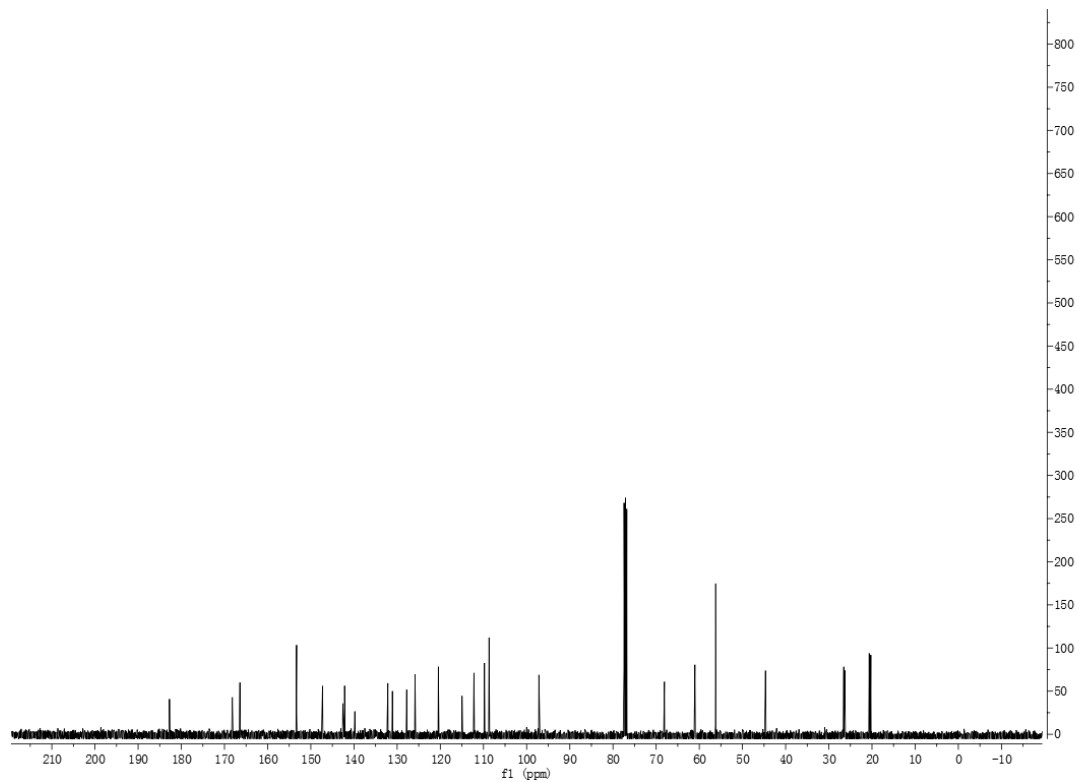

$^{13}\text{C}$  NMR of compound 25

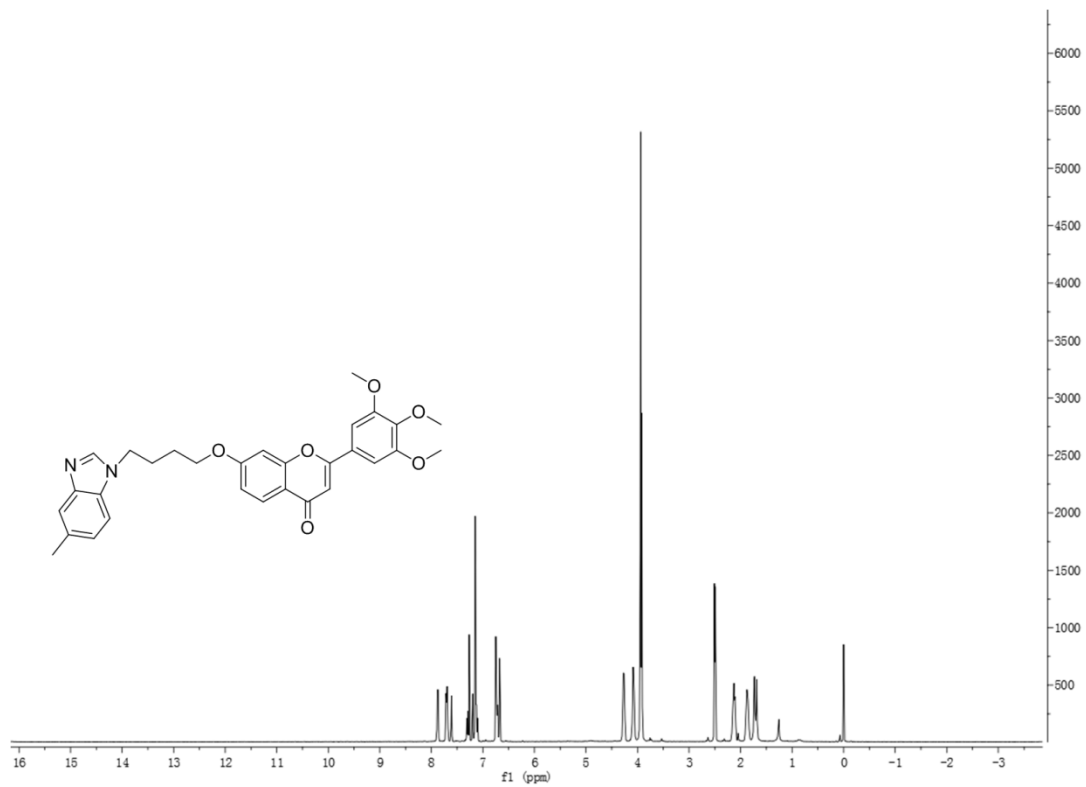

<sup>1</sup>H NMR of compound 26

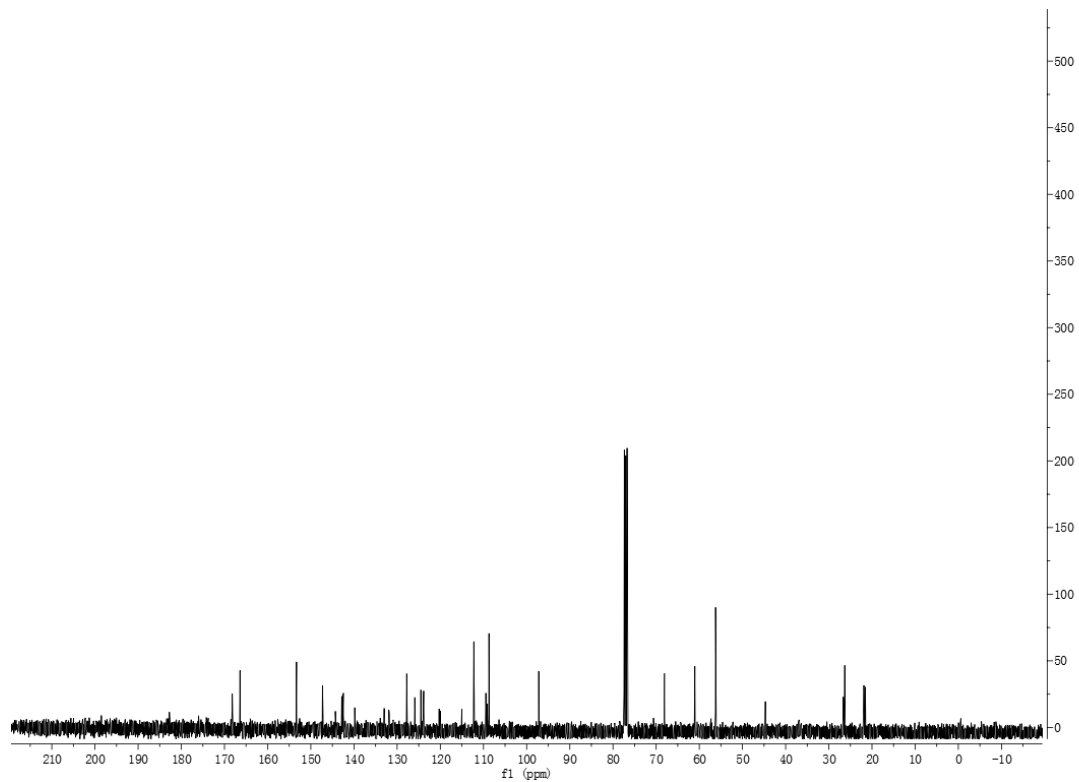

<sup>13</sup>C NMR of compound 26

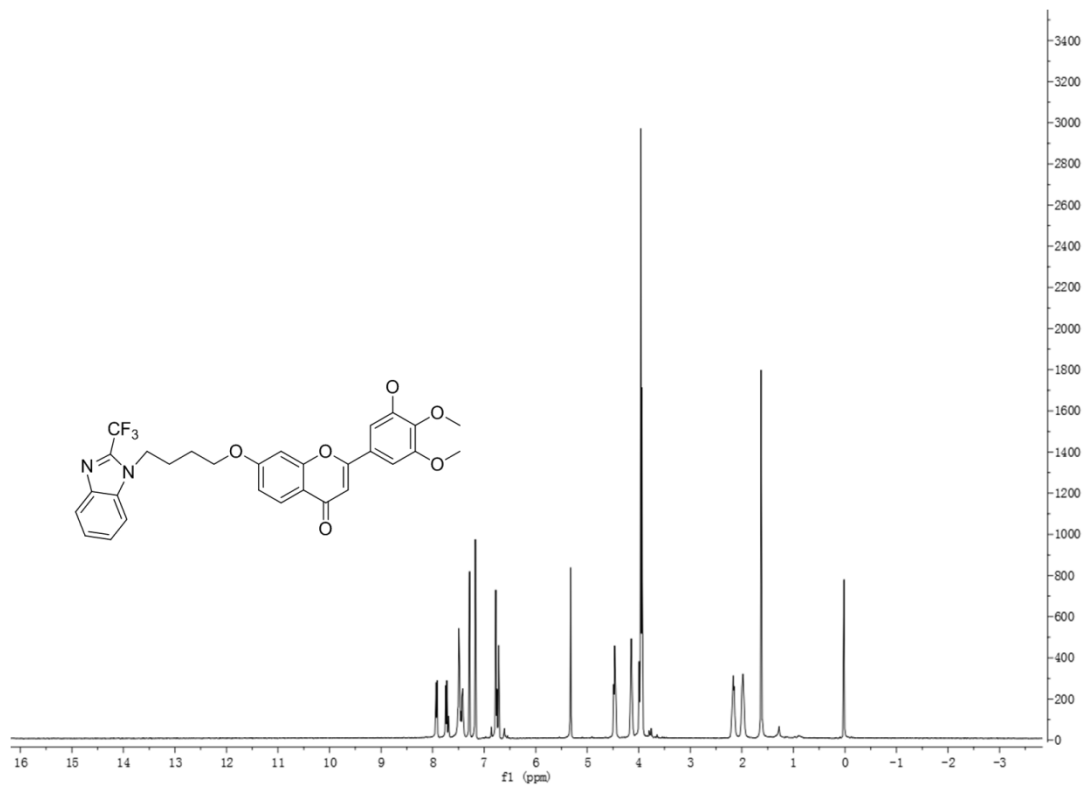

<sup>1</sup>H NMR of compound 27

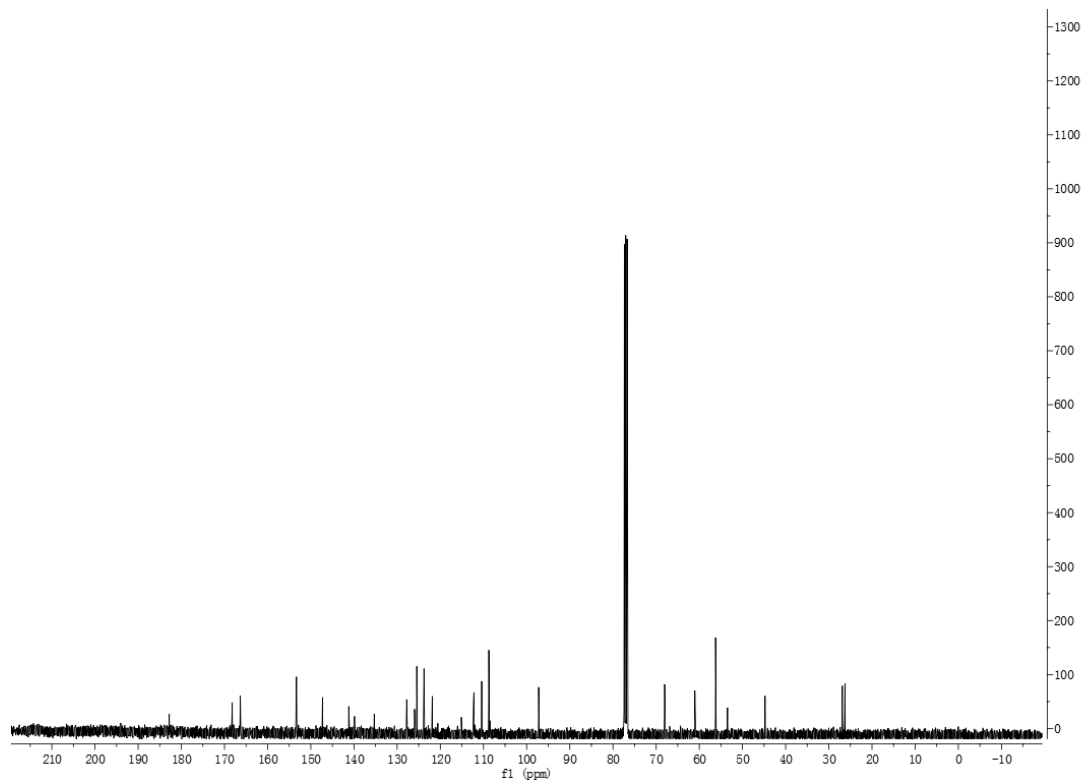

<sup>13</sup>C NMR of compound 27

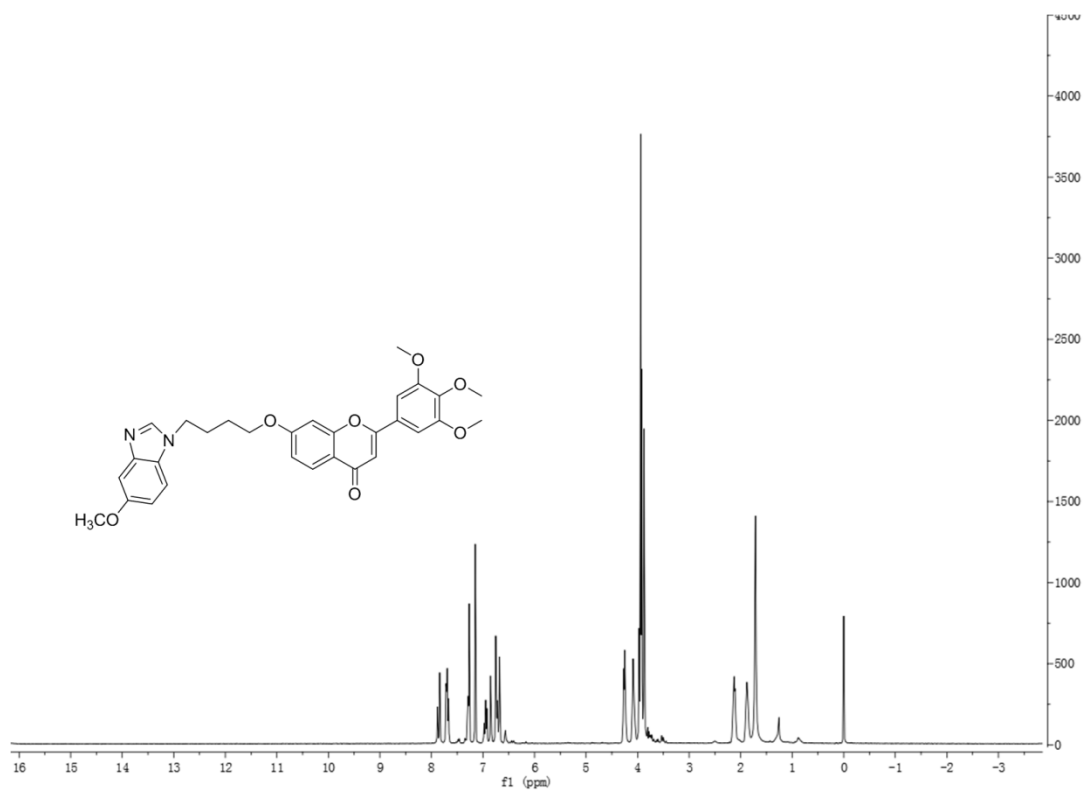

<sup>1</sup>H NMR of compound 28

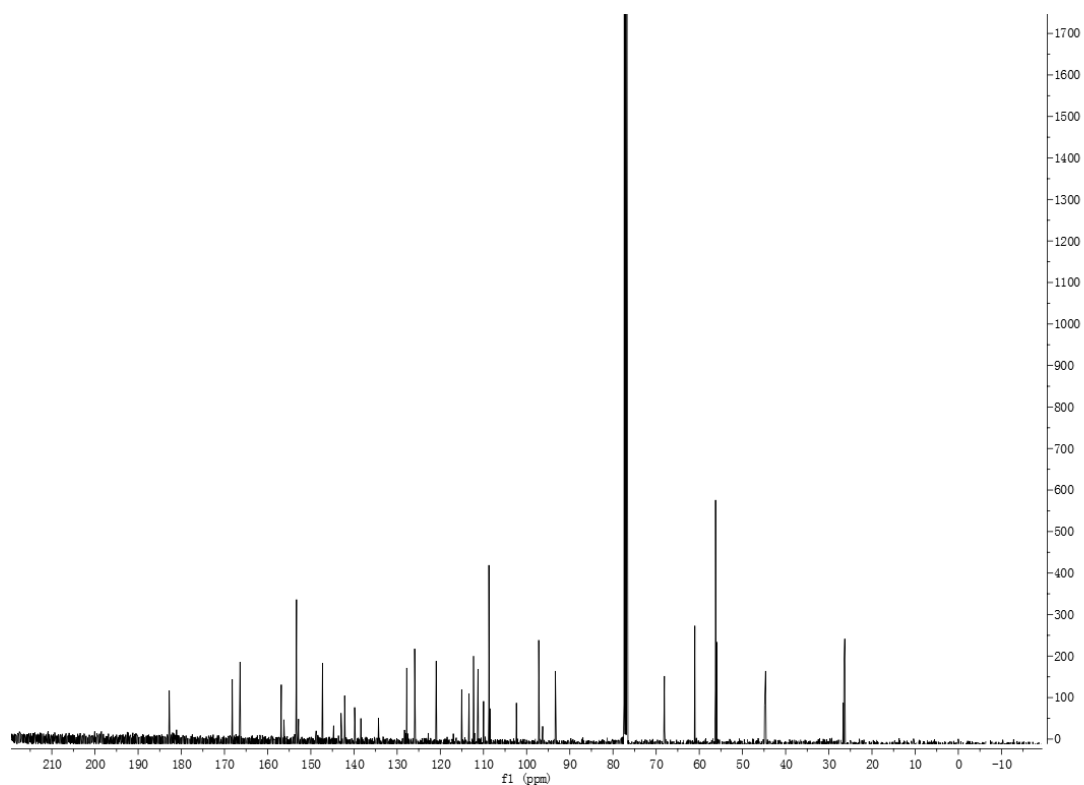

<sup>13</sup>C NMR of compound 28
